1 Mcc1229, an Stx2a-amplifying microcin, is produced *in vivo* and requires CirA for activity

2

3 Erin M. Nawrocki,<sup>a</sup> Laura E. Hutchins,<sup>b</sup> Kathryn A. Eaton,<sup>b</sup> Edward G. Dudley<sup>a,c\*</sup>

4

5 <sup>a</sup>Department of Food Science, The Pennsylvania State University, University Park, PA, USA

6 <sup>b</sup>Department of Microbiology and Immunology, University of Michigan, Ann Arbor, MI, USA

7 <sup>c</sup>*E. coli* Reference Center, The Pennsylvania State University, University Park, PA, USA

8

9 Running Title: CirA is the Mcc1229 receptor

10

11 \*Address correspondence to Edward G. Dudley, [egd100@psu.edu](mailto:egd100@psu.edu)

12

13 Abstract: 244 words

14 Body: 4810 words

15 **Abstract**

16 Enterohemorrhagic *E. coli* (EHEC) strains, including the foodborne pathogen *E. coli* O157:H7,  
17 are responsible for thousands of hospitalizations each year. Various environmental triggers can  
18 modulate pathogenicity in EHEC by inducing expression of Shiga toxin (Stx), which is encoded  
19 on a lambdoid prophage and transcribed together with phage late genes. Cell-free supernatants of  
20 the sequence type (ST) 73 *E. coli* strain 0.1229 are potent inducers of Stx2a production in EHEC,  
21 suggesting that 0.1229 secretes a factor that activates the SOS response and leads to phage lysis.  
22 We previously demonstrated that this factor, designated microcin (Mcc) 1229, was proteinaceous  
23 and plasmid-encoded. To further characterize Mcc1229 and support its classification as a microcin,  
24 we investigated its regulation, determined its receptor, and identified loci providing immunity.  
25 Production of Mcc1229 was increased upon iron limitation, as determined by ELISA, *lacZ* fusions,  
26 and qRT-PCR. Spontaneous Mcc1229-resistant mutants and targeted gene deletion revealed that  
27 CirA was the Mcc1229 receptor. TonB, which interacts with CirA in the periplasm, was also  
28 essential for Mcc1229 import. Subcloning of the Mcc1229 plasmid indicated that Mcc activity was  
29 neutralized by two ORFs, each predicted to encode a domain of unknown function (DUF)-  
30 containing protein. In a germfree mouse model of infection, colonization with 0.1229 suppressed  
31 subsequent colonization of EHEC. Although Mcc1229 was produced *in vivo*, it was dispensable  
32 for colonization suppression. The regulation, import, and immunity determinants identified here  
33 are consistent with features of other Mccs, suggesting that Mcc1229 be included in this class of  
34 small molecules.

## 35 **Introduction**

36 Enterohemorrhagic *Escherichia coli* (EHEC) are foodborne pathogens that can cause  
37 severe clinical complications, including hemorrhagic colitis (HC) and hemolytic uremic syndrome  
38 (HUS), through the production of Shiga toxin (Stx) and other virulence factors (1–3). Stx is  
39 encoded on a temperate lambdoid bacteriophage and is therefore induced via the bacterial SOS  
40 response (4–6). Certain antibiotics and DNA-damaging agents are known to trigger phage  
41 induction and increase the expression of Stx *in vivo* and *in vitro* (7, 8). In the intestinal  
42 environment, members of the microbiome and their metabolites can modulate the pathogenicity of  
43 EHEC strains in multiple ways (9). Commensal bacteria can reduce the growth and colonization  
44 of EHEC, broadly limiting virulence factor expression (10). Alternatively, strains that are sensitive  
45 to the *stx*-converting phage can be infected and thus amplify Stx production (11–13). Finally, small  
46 molecules such as bacteriocins that target EHEC can both inhibit growth and promote Stx  
47 expression by induction of the phage lytic cycle (14, 15).

48 Bacteriocin activity was first described nearly a century ago (16) and is widespread in *E.*  
49 *coli*, with up to 60% of strains identified as colicin producers in some surveys (17–19). Microcins,  
50 which have a lower molecular weight than colicins (20), are found less frequently and are not as  
51 well characterized (21). They are generally smaller than 10 kDa in size, are not SOS-induced, and  
52 are secreted by intact cells (22, 23). Foundational studies on microcin B17 (MccB17), MccJ25,  
53 and others revealed that microcins are typically expressed in stationary phase, when cells are  
54 starved for nutrients (24–26). In particular, iron-limiting conditions often stimulate microcin  
55 production (27–29). Some microcins are post-translationally modified with the addition of  
56 siderophores (30–32), and many colicins and microcins exploit siderophore receptors for entry into  
57 target cells (33, 34). Expression of bacteriocins in nutrient-poor environments can also confer a

58 fitness advantage to producing strains, allowing them to kill their competitors and better colonize  
59 a given niche (35–37). In mouse models, for example, iron limitation can be advantageous for  
60 either pathogens (38) or probiotic bacteria (39) that produce bacteriocins.

61         Prior studies of the human *E. coli* isolate 0.1229 revealed that cell-free supernatants from  
62 this strain were sufficient to induce the SOS response and increase the Stx expression of EHEC  
63 (15). Microcin B17, which is encoded on a 96.3 kb plasmid in 0.1229, contributed to but was not  
64 fully responsible for SOS induction or Stx amplification (15). An additional factor with Stx-  
65 amplifying activity was localized to p0.1229\_3, a 12.9 kb plasmid in the strain (15). This activity  
66 was dependent on TolC for efflux from 0.1229 and TonB for import into the target cell (15). The  
67 SOS-inducing, Stx-amplifying agent of p0.1229\_3 is presumed to be a new microcin, first  
68 described in strain 0.1229 and thus designated Mcc1229. Although the chemical identity of  
69 Mcc1229 is not known, it is encoded within a 5.2 kb region of p0.1229\_3 whose annotations  
70 include hypothetical proteins, an ABC transporter, a cupin superfamily protein, and domain of  
71 unknown function (DUF)-containing proteins (15).

72         Only a small number of microcins have been purified, and their functions in complex  
73 environments like the gut microbiome are not well defined (21). Some have theorized that the  
74 microcins prevalent in phylogroup B2 *E. coli* enhance their ability to dominate the rectal niche and  
75 colonize the urinary tract (40). 0.1229 is a phylogroup B2 isolate of sequence type (ST) 73. Other  
76 members of ST73 are notable urinary pathogens (e.g. CFT073), and the lineage carries many  
77 virulence factors that can promote colonization and persistence *in vivo* (41, 42). In 0.1229,  
78 MccB17 and Mcc1229 may serve this purpose, as they are lethal to competing *E. coli* strains (15).  
79 To elucidate the role of the putative microcin Mcc1229, we have here clarified its export, import,

80 immunity, and regulation. We have also probed the effect of 0.1229 and its microcins in a germfree  
81 mouse model of EHEC infection.

82

## 83 **Results**

84 *Stx2a* levels are increased upon growth in supernatants of *E. coli* 0.1229  $\Delta$ B17::FRT

85 *E. coli* strain 0.1229 produces two microcins: microcin B17 and the lesser characterized  
86 Mcc1229 (15). To isolate the impact of Mcc1229, we deleted the microcin B17 operon by one-  
87 step recombination, generating 0.1229  $\Delta$ B17::FRT. Inactivation of both microcins was  
88 accomplished by one-step recombination of 0.1229  $\Delta$ B17::FRT with the  $\Delta$ 6::*cat* PCR product,  
89 which was previously designed to remove a hypothetical protein and an ABC transporter from the  
90 Mcc1229 cluster on p0.1229\_3 (15). These ORFs were formerly described as Hp1 and ABC based  
91 on their predicted protein products (15). In accordance with microcin nomenclature and in  
92 reference to their role in amplifying Shiga toxin, we have assigned genes in the Mcc1229 region  
93 names that begin with *mctA* (microcin involved in toxin amplification). Hp1 and ABC have been  
94 renamed *mctA* and *mctB*, respectively, and therefore the  $\Delta$ 6::*cat* deletion will be now be referenced  
95 as  $\Delta$ *mctAB*::*cat*.

96 To determine the effect of culture conditions and to optimize production of Mcc1229 for  
97 future studies, *E. coli* 0.1229  $\Delta$ B17::FRT was grown in various liquid media. These included LB  
98 with 0%, 0.5%, and 1% NaCl (no, low, and high salt, respectively) and M9 supplemented with  
99 casamino acids, thiamine, and 0.4% of glucose, glycerol, maltose, or fructose. *Stx2a* amplification  
100 by Mcc1229 was determined by culturing the *stx2a*<sup>+</sup> *E. coli* O157:H7 strain PA2 in spent  
101 supernatants. Supernatants from LB cultures of 0.1229  $\Delta$ B17::FRT amplified *Stx2a* to the greatest  
102 extent (Figure 1). Amplification was dependent on Mcc1229 production, as the supernatants of

103 0.1229  $\Delta$ B17::FRT  $\Delta$ mctAB::cat (which produced neither MccB17 nor Mcc1229) were  
104 statistically equivalent to broth controls ( $p = 0.9789$ ) and induced minimal levels of Stx2a (Figure  
105 1).

106

### 107 *Iron suppresses Stx2a-amplifying activity*

108 To further investigate conditions influencing Mcc1229 expression, we added the metal  
109 chelating agents EDTA or 2,2'-bipyridyl (bipy) to cultures of 0.1229  $\Delta$ B17::FRT grown in LB  
110 with high salt. Supernatants from 0.1229  $\Delta$ B17::FRT cultures grown in LB + bipyridyl amplified  
111 Stx2a levels beyond those from LB alone (Figure 2). In the presence of low concentrations (10  
112  $\mu$ M) of ferric chloride, EDTA and bipyridyl supernatants still significantly amplified Stx2a above  
113 unsupplemented LB supernatant levels (Figure 2). When FeCl<sub>3</sub> levels were increased to 200  $\mu$ M—  
114 equimolar to EDTA or bipyridyl—the Stx2a-amplifying effect of these supernatants was  
115 suppressed (Figure 2). In other words, excess iron negated the impact of bipyridyl on Mcc1229.  
116 By contrast, the addition of 200  $\mu$ M CaCl<sub>2</sub>, MgCl<sub>2</sub>, or MnCl<sub>2</sub> to 0.1229  $\Delta$ B17::FRT cultures did  
117 not reduce their Stx2a-amplifying activity (data not shown), suggesting that this effect was specific  
118 to FeCl<sub>3</sub>.

119

### 120 *mctA, mctB, and mctC ORFs are required for Stx2a amplification*

121 Prior work demonstrated that the p0.1229\_3 plasmid, and specifically a 5.2 kb region  
122 therein, was sufficient to amplify Stx2a (15). This region was moved into the medium-copy  
123 pBR322 vector, replacing the *bla* gene (15). The resulting construct is termed pBR322::mcc1229.  
124 The mcc1229 region is predicted to encode three hypothetical proteins (MctA, MctF, and MctG),  
125 an ABC transporter (MctB), a cupin domain protein (MctC), and two domain of unknown function

126 proteins (MctD and MctE) (Figure 3a). Each of these was previously deleted by one-step  
127 recombination in the native 0.1229 strain, inserting a *cat* marker in its place on p0.1229\_3. *mctA*,  
128 *mctB*, *mctC*, and *mctF* deletion mutants were significantly impaired for Stx2a amplification (15).  
129 To avoid any potential polar effects of the *cat* insertions, we here constructed markerless in-frame  
130 deletions of the same ORFs in the pBR322::mcc1229 clone instead. When the *mctA*, *mctB*, and  
131 *mctC* ORFs were deleted from this region, the resulting constructs no longer amplified Stx2a  
132 (Figure 3b). Supernatants from C600 (pBR322::mcc1229 $\Delta$ *mctA*), C600  
133 (pBR322::mcc1229 $\Delta$ *mctB*), and C600 (pBR322::mcc1229 $\Delta$ *mctC*) were indistinguishable from an  
134 empty vector control (Figure 3b). C600 (pBR322::mcc1229 $\Delta$ *mctF*) and C600  
135 (pBR322::mcc1229 $\Delta$ *mctG*) were not diminished in their ability to amplify Stx2a (data not shown).

136

### 137 *p0.1229\_3* ORFs are in the *Fur* regulon

138 Sequence analysis of the Stx2a-amplifying region on p0.1229\_3 revealed a putative *Fur*  
139 binding site [ataAATGATAActATTcTC, where uppercase letters indicate identity to the  
140 consensus (43)] upstream of the *mctA* open reading frame (Figure 3a). The region upstream of  
141 *mctA* was ligated into pRS551 and successfully promoted transcription of *lacZ* (Figure 4a).  
142 Promoter regions upstream of the *mctB*, *mctC*, and *mctE* ORFs were also verified in this manner  
143 (Figure 4a). Transcriptional activity of the *mctA* promoter decreased when supplemented with  
144 ferric chloride (Figure 4a), suggesting that MctA was regulated by iron. These data were supported  
145 by transcriptional analysis in 0.1229 and 0.1229  $\Delta$ *fur*::*cat*. qRT-PCR targeting *mctA*, *mctB*, *mctC*,  
146 and *mctE* regions indicated that expression of each gene was increased in the *fur* mutant (Figure  
147 4b), consistent with a model in which the Fe-*Fur* complex repressed transcription of the microcin.

148

149 *CirA is the outer membrane receptor for Mcc1229*

150 To identify the receptor for Mcc1229, we investigated its entry into target cells in several  
151 ways. First, in an agar overlay assay, we showed that Mcc1229 inhibited the susceptible *E. coli*  
152 O157:H7 strain PA2, creating a zone of clearing around Mcc1229-producing colonies.  
153 Spontaneous Mcc1229-resistant mutants of PA2 that grew within the zone of inhibition were then  
154 subject to whole-genome sequencing. Three independent colonies revealed mutations that would  
155 affect CirA expression: two contained frameshift mutations in the *cirA* ORF that introduce a  
156 premature stop codon, and one carried an 86 bp deletion directly upstream of the *cirA* start codon  
157 (Table 1). These isolates (PA2.1, PA2.2, and PA2.3) were insensitive to Stx2a amplification by  
158 0.1229  $\Delta$ B17::*cat* supernatants (Figure 5). Second, a targeted deletion of *cirA* in PA2 by one-step  
159 recombination ( $\Delta$ *cirA*::*kan*) was also resistant to Mcc1229-mediated Stx2a amplification (Figure  
160 5). Sensitivity was restored by complementation with the medium-copy number pBR322::*cirA*  
161 (Figure 5). Finally, *cirA* was confirmed as the Mcc1229 receptor using a set of indicator strains  
162 bearing mutations in known colicin receptors (44). While a wild-type indicator strain was  
163 susceptible to Mcc1229 inhibition in the agar overlay method, a *cirA* mutant was resistant to this  
164 microcin (data not shown).

165

166 *Mcc1229 entry requires TonB*

167 CirA is a known TonB-dependent transporter, and the import of CirA-dependent colicins  
168 requires the activity of TonB in the periplasm (45). Earlier data also implicated TonB in SOS  
169 induction by Mcc1229 in a reporter strain (15). We next sought to inactivate *tonB* in *E. coli*  
170 O157:H7 to determine its role in Stx2a amplification by Mcc1229. Attempts to delete *tonB* in the  
171 PA2 background by various methods were unsuccessful. *tonB* was instead deleted by one-step



172 recombination in EDL933, a well-characterized *stx1a*<sup>+</sup>*stx2a*<sup>+</sup> O157:H7 strain (46). A  $\Delta$ *tonB::cat*  
173 mutant did not amplify Stx2a in response to supernatants containing Mcc1229 (Figure 6). When  
174 complemented with a plasmid copy of *tonB* (pKP315), the strain behaved as wildtype (Figure 6).  
175 These data indicated that CirA and TonB were both necessary for Stx2a amplification by Mcc1229.

176

177 *Immunity to Mcc1229 is mediated by the mctD-mctE region of p0.1229\_3*

178 The lethality of colicins and microcins necessitates a mechanism of protection for the  
179 producing cell. By cloning progressively smaller fragments of p0.1229\_3 into pBR322, we  
180 identified a region of the plasmid that was sufficient to confer immunity to Mcc1229. Two adjacent  
181 ORFs, *mctD* and *mctE*, each predicted to encode a domain of unknown function (DUF)-containing  
182 protein, protected MG1655 from Mcc1229-mediated killing (Figure 7a). Vectors containing either  
183 of the single ORFs were not protective (Figure 7a). When the pBR322::*mctDE* construct was  
184 transformed into PA2, PA2 became insensitive to 0.1229  $\Delta$ B17::*cat* supernatant and Stx2a  
185 production did not increase (Figure 7b).

186

187 *Mcc1229 is expressed in vivo but is not required for suppression of PA2*

188 To determine the effect of microcins *in vivo*, we colonized germfree mice with *E. coli*  
189 0.1229 and its derivatives and collected fecal samples at one day post infection. After suspending  
190 feces in LB, samples were centrifuged to pellet the solid matter and the supernatant spotted atop a  
191 suspension of the PA2 test strain. Supernatants from mice infected with 0.1229 inhibited the  
192 growth of PA2, but those from mice infected with a Mcc1229 knockout strain had no effect (Figure  
193 8a and 8b).

194 The role of Mcc1229 in the germfree mouse model of EHEC was investigated by sequential  
195 inoculation of 0.1229 and PA2. Mice were first infected with 0.1229 or its derivatives, then with  
196 PA2 seven days later. Monoinfections of 0.1229 or PA2 served as controls. PA2 alone was able to  
197 colonize at concentrations of between  $10^8 - 10^{10}$  CFU/g and caused symptoms consistent with Stx-  
198 mediated disease including colitis and acute kidney injury (47, 48). When mice were colonized  
199 with 0.1229 prior to the introduction of PA2, PA2 colonization was almost fully suppressed. PA2  
200 was recovered from the cecal contents of only six of 65 mice coinfecting with 0.1229 or its  
201 derivatives (Figure 8c, Table 2). This effect did not require Mcc1229 or MccB17, however, as the  
202 single and double microcin mutants of 0.1229 were capable of suppressing PA2 equivalent to the  
203 wildtype (Figure 8c, Table 2). Colonization suppression was not protective against disease, as PA2  
204 was still lethal to coinfecting mice and Stx was detected in feces from all groups (Figure 8d, Table  
205 3). This likely indicates that PA2 was present at some time during infection but was either lost or  
206 suppressed below the limit of detection.

207

## 208 Discussion

209 A putative microcin from the human *E. coli* isolate 0.1229 was previously shown to induce  
210 the SOS response and Stx expression in target strains (15). Here, we have confirmed the activity  
211 of this microcin (Mcc1229), isolated its activity from that of a second microcin encoded by 0.1229  
212 (MccB17), and further characterized its production, regulation, and effects. Like several other  
213 colicins and microcins, Mcc1229 uses the CirA siderophore receptor (Figure 5) and the TonB  
214 complex (Figure 6) for entry into a target cell. CirA was first identified as the colicin I receptor  
215 and is also used by colicin/microcin V (33, 49). In the producing strain, evidence suggests that  
216 Mcc1229 requires the *mctABC* region of plasmid p0.1229\_3 for activity (Figure 3b). Open reading

217 frames similar to *mctA*, with cysteine-rich C-terminal regions and cognate ABC transporters, are  
218 also consistent with typical microcin operons (50).

219         The functional contributions of the cupin-like *mctC* and DUF-containing *mctD-mctE* ORFs  
220 in the Mcc1229 cluster have not yet been elucidated. In our system, the *mctDE* region conferred  
221 immunity to Mcc1229 killing and Stx amplification (Figure 7), but it is not clear whether the DUF-  
222 containing proteins encoded by *mctD* and *mctE* directly interact with the microcin. Current Pfam  
223 records indicate that the DUF2164 domain present in MctE is found in 804 protein sequences in  
224 715 species, but it is not associated with a clan or superfamily (51). DUF4440, which is found in  
225 MctD, belongs to a family in the nuclear transport factor (NTF) 2 clan, which includes numerous  
226 proteins with enzymatic and non-enzymatic functions (52). Some proteins with NTF2-like folds  
227 are known to provide immunity to bacterial toxins, but their sequences (Pfam PF15655) are diverse  
228 and dissimilar to the DUF4440 domain in MctD (53). Proteins with DUF4440 and/or NTF2-like  
229 domains have also been shown to operate in polyketide biosynthesis pathways, where they are  
230 involved in catalyzing the formation of natural products (54, 55). Some proteins with cupin  
231 domains have enzymatic activity (56, 57), so it is possible that the p0.1229\_3 MctC is involved in  
232 processing or modification of Mcc1229. Because our attempts to complement the *mctA*, *mctB*, and  
233 *mctC* deletion mutants *in trans* were unsuccessful (data not shown), we cannot speculate further  
234 on the contributions of these ORFs to Mcc1229 production.

235         Beyond its cellular export and import, the observed Fe-Fur regulation of Mcc1229 further  
236 supports its classification as a microcin. Mcc1229's amplification of Stx was increased in the  
237 presence of chelating agents, and this effect could be reversed by the addition of iron specifically  
238 (Figure 2). Moreover, the expression of *mctA*, *mctB*, *mctC*, and *mctE* genes were increased in a  
239  $\Delta fur::cat$  background (Figure 4b). Taken together, these data likely indicate that Mcc1229 is

240 transcriptionally repressed by the canonical Fe-Fur complex (58). A similar pattern is seen in the  
241 regulation of microcin E492 in *Klebsiella pneumoniae* (29). Like the site upstream of *mceX* in the  
242 MccE492 operon, the putative Fur box upstream of *mctA* is 68% (13/19 nt) identical to the  
243 consensus Fur sequence described for *E. coli* (59, 60). Fur-regulated microcins may provide a  
244 competitive advantage for *E. coli* strains *in vivo*, where iron availability is restricted (61, 62). The  
245 Fur regulon is essential for survival of various *E. coli* pathotypes *in vivo* (63–65), and the B2  
246 phylogroup of *E. coli* (which includes 0.1229) is associated with a high prevalence of microcin  
247 genes (66).

248 In our study, microcin Mcc1229 was produced *in vivo* but had no effect on EHEC  
249 colonization or disease (Figure 8). Nevertheless, we observed a striking example of suppression  
250 by *E. coli* 0.1229 in which PA2 was rarely if ever recovered from coinfections. Most other *E. coli*  
251 do not suppress EHEC to the same extent, although there is precedent for colonization suppression  
252 by the probiotic strain Nissle 1917 (67, 68). Intriguingly, Nissle and 0.1229 both belong to ST73,  
253 a lineage frequently isolated from ExPEC infections (69). ST73 strains carry a broad assortment  
254 of virulence factors, including many genes for adherence and iron acquisition that could provide a  
255 selective advantage over competitors (70). Ongoing studies may determine whether colonization  
256 resistance is a trait that is common to ST73.

257 Interactions with the microbiome can alter the virulence of EHEC in numerous ways.  
258 Understanding these effects will help predict the unique pathogenicity and disease outcomes of a  
259 given infection. Here, we have expanded upon the attributes of Mcc1229, a new *E. coli* microcin  
260 that induces the SOS response and amplifies Stx2a expression *in vitro*. When characterizing the  
261 interplay of Mcc1229 and EHEC *in vivo*, however, we found that microcin activity was not a  
262 significant contributor to EHEC virulence or to colonization efficiency. This discrepancy

263 highlights the need for additional research regarding the dynamics of bacteriocin expression in the  
264 intestinal environment. The regulation, stability, and activity spectrum of bacteriocins all influence  
265 their physiological role, as do external factors such as inflammation and nutrient availability.  
266 Although Mcc1229 could be unified with other microcins based on the cellular factors described  
267 in this work, its actual ecological impact was not apparent from our germfree mouse model and  
268 awaits further clarification.

## 269 **Materials and Methods**

### 270 *Bacterial strains and culture conditions*

271 *E. coli* strains were routinely grown in lysogeny broth (LB; 10 g/l tryptone, 5 g/l yeast  
272 extract, 10 g/l NaCl) at 37°C and maintained in 20% glycerol at -80°C. Minimal medium (M9)  
273 was formulated with 12.8 g/l Na<sub>2</sub>HPO<sub>4</sub>·7H<sub>2</sub>O, 3 g/l KH<sub>2</sub>PO<sub>4</sub>, 0.5 g/l NaCl, 1 g/l NH<sub>4</sub>Cl, 2 mM  
274 MgSO<sub>4</sub>, and 0.1 mM CaCl<sub>2</sub>. M9 was supplemented with 0.1% casamino acids, 0.005% thiamine,  
275 and 0.4% of the desired carbon source. Mueller-Hinton (MH) agar was prepared according to the  
276 manufacturer's instructions. EDTA, 2,2'-bipyridyl, FeCl<sub>3</sub>, CaCl<sub>2</sub>, MgCl<sub>2</sub>, and MnCl<sub>2</sub> were added  
277 to media at 0.2 mM. Antibiotics were used as follows: ampicillin, 50 µg/ml; chloramphenicol, 12.5  
278 µg/ml; kanamycin, 25 µg/ml; tetracycline, 10 µg/ml. All media components were purchased from  
279 BD Difco (Franklin Lakes, NJ) and all enzymes from New England Biolabs (NEB; Ipswich, MA)  
280 unless otherwise noted.

281

### 282 *One-step recombination*

283 *E. coli* knockouts were constructed according to the protocol of Datsenko and Wanner (71).  
284 Primers incorporating 40 bp immediately upstream and downstream of the gene of interest were  
285 used to amplify the *cat* cassette from pKD3 or the *kan* cassette from pKD4 (Table 1). The target  
286 strain was first transformed with pKD46 and grown to mid-log phase, then induced with 0.02 M  
287 L-arabinose for 1 h. Cells were washed with cold water and 10% glycerol and electroporated with  
288 the *cat* or *kan* PCR product using a GenePulser II instrument (2.5 kV, 0.2 cm gap cuvettes; Bio-  
289 Rad, Hercules, CA). Transformants were verified by colony PCR with primers approximately 200  
290 bp up- and downstream of the gene of interest, and the site of the insertion was confirmed by  
291 Sanger sequencing (Table 1). Mutants were complemented with a plasmid copy of the gene of

292 interest, cloned into the medium-copy number vector pBR322 by Gibson assembly (72). Assembly  
293 primers were designed using NEBuilder (<https://nebuilder.neb.com>; Table 1). Amplicons were  
294 purified with the QIAquick Cleanup Kit (Qiagen, Germantown, MD) and assembled with the  
295 Gibson Assembly Cloning Kit according to the manufacturers' instructions. Assembly junctions  
296 were likewise confirmed with colony PCR and Sanger sequencing (Table 1).

297 Because multiple efforts to inactivate *tonB* in PA2 by one-step recombination were  
298 unsuccessful, we generated a  $\Delta tonB::cat$  mutant in the EDL933 background. This mutant was  
299 complemented by pKP315, kindly provided by Dr. Kathleen Postle, which carries an arabinose-  
300 inducible copy of *tonB*. L-arabinose was added to EDL933 cultures at 0.3%.

301

### 302 *LacZ* fusions

303 Transcriptional activity was measured by fusing selected p0.1229\_3 fragments to a  
304 promoterless *lacZ* gene in the pRS551 vector (73). Fragments were amplified from p0.1229\_3  
305 using the given primers (Table 1) and digested with EcoRI-HF and BamHI-HF enzymes. The  
306 products were cleaned up using the QIAquick kit and ligated into an EcoRI-BamHI digest of  
307 pRS551. Ligation mixtures were transformed into chemically competent DH5 $\alpha$  cells (New  
308 England Biolabs) and verified by miniprep and restriction digests. Constructs were then  
309 electroporated into *E. coli* 0.1229. Reporter strains were cultured in LB, shaking at 37°C, and  
310 grown until mid-logarithmic phase. Cells were then harvested and suspended in Z buffer. LacZ  
311 activity was measured by the hydrolysis of *o*-nitrophenyl- $\beta$ -D-galactoside according to the method  
312 of Miller *et al.* (74).

313

### 314 *qPCR*

315 RNA was extracted from 16 h LB cultures of 0.1229 and 0.1229  $\Delta fur::cat$  using TRIzol  
316 (ThermoFisher Scientific, Waltham, MA). Genomic DNA was removed by digestion with RQ1  
317 RNase-Free DNase (Promega, Madison, WI) and RNA converted to cDNA using the  
318 ThermoScript RT-PCR system (ThermoFisher). Expression of *mctA*, *mctB*, *mctC*, and *mctE* genes  
319 was quantified in 20  $\mu$ l reactions using PerfeCTa SYBR Green FastMix (Quantabio, Beverly, MA)  
320 and 200 nM qPCR primers (Table 1) on a QuantStudio3 instrument (ThermoFisher). To validate  
321 the efficiency (>95%) of each primer pair, its target was amplified from genomic DNA and  
322 purified in a spin column cleanup kit (Dot Scientific Inc., Burton, MI). The concentration of this  
323 product was measured by spectrophotometry (NanoDrop 1000, ThermoFisher) and ten-fold  
324 dilutions ranging from  $10^{-2}$  through  $10^{-7}$  ng/ $\mu$ l were used as templates in qPCR. A standard curve  
325 was constructed from the resulting Ct values. Differences in gene expression between wildtype  
326 and  $\Delta fur::cat$  strains were determined by the  $\Delta\Delta$ Ct method, using the 16S ribosomal RNA *rrsH*  
327 gene as an internal control (75).

328

### 329 *In-frame deletions and site-directed mutagenesis*

330 Prior work demonstrated that a fragment of the p0.1229\_3 plasmid encompassing  
331 nucleotides 2850 through 7950 was sufficient to amplify Stx when cloned into pBR322 (15). In-  
332 frame deletions of individual ORFs in this vector, pBR322::mcc1229, were generated with NEB's  
333 Q5 Site-Directed Mutagenesis Kit. Primers facing outward from the chosen ORF were designed  
334 with the NEBaseChanger tool and used with Q5 polymerase to amplify a linear fragment from  
335 pBR322::mcc1229 (Table 1). This product was treated with KLD enzyme cocktail to digest  
336 template DNA and recircularize the plasmid according to the manufacturer's instructions.  
337 Constructs were confirmed by PCR of DH5 $\alpha$  transformant colonies using VF/VR primers (Table



338 1). Mutations were then verified by Sanger sequencing and plasmids electroporated into C600 as  
339 described above to assure that no wildtype copies remained.

340

#### 341 *Inhibition assays*

342 Microcin production was evaluated by measuring inhibition of a target strain in agar  
343 overlays (76). The microcin-producing strain was spot-inoculated on MH agar and incubated at  
344 37°C for approximately 24 h. Plates were inverted over filter paper discs impregnated with 300  $\mu$ l  
345 chloroform for 30 minutes to kill producing cells. Cultures of the target strains were then  
346 suspended to 0.05 OD<sub>600</sub> per ml in soft (0.7%) nutrient agar, poured atop the plates, and allowed  
347 to solidify. After overnight incubation at 37°C, inhibition was noted by the presence of halos  
348 surrounding a microcin-producing colony. Zones of inhibition were quantified by subtracting the  
349 diameter of the producing colony from the diameter of the clear zone surrounding it. Spontaneous  
350 mutants growing within the zones of inhibition were restreaked to purify and retested in agar  
351 overlays to confirm microcin resistance. Known microcin and colicin producers and their  
352 corresponding indicator strains were from the NCTC reference set, kindly provided by Dr. Robert  
353 F. Roberts (44).

354 For inhibition assays using supernatants, plates were inoculated with the test strain in soft  
355 agar as described above. Fecal samples from mice colonized with 0.1229 or its derivatives were  
356 collected at 1 day after inoculation with PA2, suspended in 100-200  $\mu$ L LB broth, and centrifuged.  
357 Ten  $\mu$ l of supernatant were spotted atop the test strain and allowed to dry before overnight  
358 incubation at 37°C.

359

#### 360 *Whole-genome sequencing and bioinformatics*

361 Genomic DNA was extracted from overnight cultures using the DNeasy Blood and Tissue  
362 Kit (Qiagen). Libraries were prepared using the Nextera XT kit (Illumina, San Diego, CA) and  
363 sequenced on the MiSeq platform, generating 2×250 bp reads. Reads were assembled in the Galaxy  
364 workspace with the SPAdes tool (77), and single nucleotide polymorphisms were identified using  
365 Snippy (78), comparing to the reference genome assembly GCA\_000335355.2. Putative Fur  
366 binding sites and promoter motifs were identified by analysis of the p0.1229\_3 sequence with  
367 RSAT (79) and BPRM (80), respectively.

368

#### 369 *Coculture and supernatant experiments*

370 Supernatants of *E. coli* 0.1229 and its derivatives were harvested after 16 h shaking at 37°C  
371 and passed through 0.2 µm cellulose acetate filters (VWR Life Sciences, Radnor, PA). Assays to  
372 quantify Stx amplification were performed as previously described (15). Briefly, the test strain of  
373 *E. coli* was suspended in 1 ml of spent supernatant to 0.05 OD<sub>600</sub> and inoculated atop solid LB  
374 agar in a 6-well plate (BD Biosciences Inc., Franklin Lakes, NJ).

375 For Stx assays, the test strains were *E. coli* O157:H7 isolates. PA2 (81) was used routinely  
376 as it demonstrated the greatest Stx amplification in prior experiments (13). EDL933 (46) was used  
377 in the event that a PA2 mutant could not be obtained. Strains were diluted to 0.05 OD<sub>600</sub> in either  
378 broth or filtered supernatant and inoculated atop solid LB agar in 6-well plates. Cultures were then  
379 incubated statically at 37°C for 8 h. Aliquots of each culture were removed to measure OD<sub>620</sub>, and  
380 the remaining volume was treated with 6 mg/ml polymyxin B for 5 min at 37°C to release  
381 intracellular Stx. Samples were then centrifuged for 5 min to pellet cell debris and supernatants  
382 were collected and stored at -80°C until use in an R-ELISA.

383

384 *R-ELISA*

385 Shiga toxin was detected in a receptor-based ELISA as previously described (14). A  
386 microtiter plate was first coated with 25 µg/ml ceramide trihexosides (Matreya Biosciences,  
387 Pleasant Gap, PA) in methanol. The methanol was evaporated and the plate subsequently blocked  
388 with 4% bovine serum albumin in phosphate buffered saline containing 0.05% Tween 20 (PBST).  
389 Supernatant samples were diluted in PBS as necessary and added to wells for 1 h, gently shaking  
390 at room temperature. Monoclonal anti-Stx2 antibody was purchased from Santa Cruz Biotech  
391 (Santa Cruz, CA) and added to wells at 1 µg/ml for 1 h. Anti-mouse secondary antibody conjugated  
392 to horseradish peroxidase was purchased from MilliporeSigma (Burlington, MA) and also added  
393 at 1 µg/ml for 1 h. Between each of the preceding steps, the plate was washed five times with  
394 PBST. One-step Ultra TMB (ThermoFisher) was then used for detection. The plate was incubated  
395 for approximately 5 min before the reaction was stopped with the addition of 2 M H<sub>2</sub>SO<sub>4</sub> and the  
396 A<sub>450</sub> was measured (Multiskan FC, ThermoFisher). A standard curve was established using serial  
397 dilutions of lysate from PA11, a high Stx2a-producer (81). The concentration of Stx2a in *E. coli*  
398 O157:H7 samples was determined by comparison to this curve and is reported in µg/ml,  
399 normalized to the OD<sub>620</sub> of each *E. coli* O157:H7 culture.

400

401 *Animal experiments*

402 Male and female Swiss-Webster mice aged 3 to 5 weeks were raised in the University of  
403 Michigan germfree colony. They were housed in soft-sided bubble isolators or sterile isocages and  
404 fed autoclaved water and laboratory chow *ad libitum*. Throughout the experiment, the mice  
405 received sterile food, water, and bedding to maintain germfree conditions, except for the infecting

406 *E. coli* strains. All animal experiments were conducted with the approval of the University of  
407 Michigan Animal Care and Use Committee.

408 Mice were infected orally with  $\sim 10^6$  CFU of each *E. coli* inoculum. In coinfection  
409 experiments, 0.1229 and its derivatives were inoculated first and were followed by PA2 one week  
410 later. Mice were weighed prior to each inoculation and just prior to euthanasia. They were  
411 evaluated daily for evidence of illness (dehydration, ruffled coat, or reluctance to move) and were  
412 euthanized 1 or 7 days after PA2 infection or when they became moribund. Prior to euthanasia,  
413 evidence of illness was recorded, and at necropsy, samples were collected for bacterial culture,  
414 Stx2 ELISA, and histologic examination.

415 For bacterial culture, samples of the cecal contents were weighed, serially diluted in sterile  
416 LB broth, and cultured on sorbitol-MacConkey (SMaC) agar. PA2 is non-sorbitol-fermenting and  
417 appears as white colonies on SMaC plates. Cultures from co-colonized mice were quantified based  
418 on the number of pink or white colonies. For quantification of Stx2, the cecal contents were stored  
419 at  $-20^{\circ}\text{C}$  until evaluation with a Premier EHEC ELISA kit (Meridian Biosciences Inc., Cincinnati,  
420 OH). The concentration of Stx2a was determined by comparison to the PA11 standard curve  
421 discussed above (81).

## 422 References

- 423 1. Griffin PM, Tauxe R V. 1991. The epidemiology of infections caused by *Escherichia coli*  
424 O157:H7, other enterohemorrhagic *E. coli*, and the associated hemolytic uremic  
425 syndrome. *Epidemiol Rev* 13:60–98.
- 426 2. Nguyen Y, Sperandio V, Padola NL, Starai VJ. 2012. Enterohemorrhagic *E. coli* (EHEC)  
427 pathogenesis. *Front Cell Infect Microbiol* 2:1–7.
- 428 3. Croxen MA, Law RJ, Scholz R, Keeney KM, Wlodarska M, Finlay BB. 2013. Recent  
429 advances in understanding enteric pathogenic *Escherichia coli*. *Clin Microbiol Rev*  
430 26:822–880.
- 431 4. Scotland SM, Smith HR, Willshaw GA, Rowe B. 1983. Vero cytotoxin production in  
432 strain of *Escherichia coli* is determined by genes carried on bacteriophage. *Lancet*  
433 322:216.
- 434 5. Ptashne M. 2004. A genetic switch: phage lambda revisited. Cold Spring Harbor  
435 Laboratory Press, Cold Spring Harbor, NY.
- 436 6. Wagner PL, Neely MN, Zhang X, Acheson DW, Waldor MK, Friedman DI. 2001. Role  
437 for a phage promoter in Shiga toxin 2 expression from a pathogenic *Escherichia coli*  
438 strain. *J Bacteriol* 183:2081–2085.
- 439 7. Zhang X, McDaniel AD, Wolf LE, Keusch GT, Waldor MK, Acheson DWK. 2000.  
440 Quinolone antibiotics induce Shiga toxin–encoding bacteriophages, toxin production, and  
441 death in mice. *J Infect Dis* 181:664–670.
- 442 8. Toshima H, Yoshimura A, Arikawa K, Hidaka A, Ogasawara J, Hase A, Masaki H,  
443 Nishikawa Y. 2007. Enhancement of Shiga toxin production in enterohemorrhagic  
444 *Escherichia coli* serotype O157:H7 by DNase colicins. *Appl Environ Microbiol* 73:7582–

- 445 7588.
- 446 9. Nawrocki EM, Mosso HM, Dudley EG. 2020. A toxic environment: a growing  
447 understanding of how microbial communities affect *Escherichia coli* O157:H7 Shiga toxin  
448 expression. *Appl Environ Microbiol* 86.
- 449 10. de Sablet T, Chassard C, Bernalier-Donadille A, Vareille M, Gobert AP, Martin C. 2009.  
450 Human microbiota-secreted factors inhibit Shiga toxin synthesis by enterohemorrhagic  
451 *Escherichia coli* O157:H7. *Infect Immun* 77:783–790.
- 452 11. Gamage SD, Strasser JE, Chalk CL, Weiss AA. 2003. Nonpathogenic *Escherichia coli*  
453 can contribute to the production of Shiga toxin. *Infect Immun* 71:3107–3115.
- 454 12. Gamage SD, Patton AK, Strasser JE, Chalk CL, Weiss AA. 2006. Commensal bacteria  
455 influence *Escherichia coli* O157:H7 persistence and Shiga toxin production in the mouse  
456 intestine. *Infect Immun* 74:1977–83.
- 457 13. Goswami K, Chen C, Xiaoli L, Eaton KA, Dudley EG. 2015. Coculture of *Escherichia*  
458 *coli* O157:H7 with a nonpathogenic *E. coli* strain increases toxin production and virulence  
459 in a germfree mouse model. *Infect Immun* 83:4185–4193.
- 460 14. Xiaoli L, Figler HM, Goswami K, Dudley EG. 2018. Nonpathogenic *E. coli* enhance  
461 Stx2a production of *E. coli* O157:H7 through *bamA*-dependent and independent  
462 mechanisms. *Front Microbiol* 9:1–13.
- 463 15. Mosso HM, Xiaoli L, Banerjee K, Hoffmann M, Yao K, Dudley EG. 2020. A putative  
464 microcin amplifies Shiga toxin 2a production of *Escherichia coli* O157:H7. *J Bacteriol*  
465 202.
- 466 16. Reeves P. 1965. The bacteriocins. *Bacteriol Rev* 29:24–45.
- 467 17. Gordon DM, Riley MA, Pinou T. 1998. Temporal changes in the frequency of

- 468 colicinogeny in *Escherichia coli* from house mice. *Microbiology* 144:2233–2240.
- 469 18. Riley MA, Gordon DM. 1992. A survey of Col plasmids in natural isolates of *Escherichia*  
470 *coli* and an investigation into the stability of Col-plasmid lineages. *J Gen Microbiol*  
471 138:1345–1352.
- 472 19. Feldgarden M, Riley MA. 1998. High levels of colicin resistance in *Escherichia coli*.  
473 *Evolution* (N Y) 52:1270–1276.
- 474 20. Asensio C, Pérez-Díaz JC, Martínez MC, Baquero F. 1976. A new family of low  
475 molecular weight antibiotics from enterobacteria. *Biochem Biophys Res Commun* 69.
- 476 21. Baquero F, Lanza VF, Baquero M-R, Del Campo R, Bravo-Vázquez DA. 2019. Microcins  
477 in *Enterobacteriaceae*: peptide antimicrobials in the eco-active intestinal chemosphere.  
478 *Front Microbiol* 10:2261.
- 479 22. Duquesne S, Destoumieux-Garzón D, Peduzzi J, Rebuffat S. 2007. Microcins, gene-  
480 encoded antibacterial peptides from enterobacteria. *Nat Prod Rep* 24:708.
- 481 23. Baquero F, Moreno F. 1984. The microcins. *FEMS Microbiol Lett* 23:117–124.
- 482 24. Connell N, Han Z, Moreno F, Kolter R. 1987. An *E. coli* promoter induced by the  
483 cessation of growth. *Mol Microbiol* 1:195–201.
- 484 25. Chiuchiolo MJ, Delgado MA, Farías RN, Salomón RA. 2001. Growth-phase-dependent  
485 expression of the cyclopeptide antibiotic microcin J25. *J Bacteriol* 183:1755–1764.
- 486 26. Moreno F, González-Pastor JE, Baquero M-R, Bravo D. 2002. The regulation of microcin  
487 B, C and J operons. *Biochimie* 84:521–529.
- 488 27. Salomón R. 1994. Influence of iron on microcin 25 production. *FEMS Microbiol Lett*  
489 121:275–280.
- 490 28. Poey ME, Azpiroz MF, Laviña M. 2006. Comparative analysis of chromosome-encoded

- 491 microcins. *Antimicrob Agents Chemother* 50:1411–1418.
- 492 29. Marcoleta AE, Gutiérrez-Cortez S, Hurtado F, Argandoña Y, Corsini G, Monasterio O,  
493 Lagos R. 2018. The ferric uptake regulator (Fur) and iron availability control the  
494 production and maturation of the antibacterial peptide microcin E492. *PLoS One*  
495 13:e0200835.
- 496 30. Nolan EM, Fischbach MA, Koglin A, Walsh CT. 2007. Biosynthetic tailoring of microcin  
497 E492m: post-translational modification affords an antibacterial siderophore-peptide  
498 conjugate. *J Am Chem Soc* 129:14336–14347.
- 499 31. Vassiliadis G, Peduzzi J, Zirah S, Thomas X, Rebuffat S, Destoumieux-Garzon D. 2007.  
500 Insight into siderophore-carrying peptide biosynthesis: enterobactin is a precursor for  
501 microcin E492 posttranslational modification. *Antimicrob Agents Chemother* 51:3546–  
502 3553.
- 503 32. Vassiliadis G, Destoumieux-Garzon D, Lombard C, Rebuffat S, Peduzzi J. 2010. Isolation  
504 and characterization of two members of the siderophore-microcin family, microcins M  
505 and H47. *Antimicrob Agents Chemother* 54:288–297.
- 506 33. Chehade H, Braun V. 1988. Iron-regulated synthesis and uptake of colicin V. *FEMS*  
507 *Microbiol Lett* 52:177–181.
- 508 34. Braun V, Patzer SI, Hantke K. 2002. Ton-dependent colicins and microcins: modular  
509 design and evolution. *Biochimie* 84:365–380.
- 510 35. Gillor O, Giladi I, Riley MA. 2009. Persistence of colicinogenic *Escherichia coli* in the  
511 mouse gastrointestinal tract. *BMC Microbiol* 9:1–7.
- 512 36. Majeed H, Gillor O, Kerr B, Riley MA. 2011. Competitive interactions in *Escherichia coli*  
513 populations: the role of bacteriocins. *ISME J* 5:71–81.



- 514 37. Riley MA. 2011. Bacteriocin-Mediated Competitive Interactions of Bacterial Populations  
515 and Communities, p. 13–26. *In* Prokaryotic Antimicrobial Peptides. Springer New York,  
516 New York, NY.
- 517 38. Nedialkova LP, Denzler R, Koeppel MB, Diehl M, Ring D, Wille T, Gerlach RG, Stecher  
518 B. 2014. Inflammation fuels colicin Ib-dependent competition of *Salmonella* serovar  
519 Typhimurium and *E. coli* in enterobacterial blooms. *PLoS Pathog* 10:e1003844.
- 520 39. Sassone-Corsi M, Nuccio S, Liu H, Hernandez D, Vu CT, Takahashi AA, Edwards RA,  
521 Raffatellu M. 2016. Microcins mediate competition among *Enterobacteriaceae* in the  
522 inflamed gut. *Nature* 540:280–283.
- 523 40. Massip C, Oswald E. 2020. Siderophore-microcins in *Escherichia coli*: determinants of  
524 digestive colonization, the first step toward virulence. *Front Cell Infect Microbiol*.
- 525 41. Vejborg RM, Friis C, Hancock V, Schembri MA, Klemm P. 2010. A virulent parent with  
526 probiotic progeny: comparative genomics of *Escherichia coli* strains CFT073, Nissle 1917  
527 and ABU 83972. *Mol Genet Genomics* 283:469–484.
- 528 42. Salvador E, Wagenlehner F, Köhler C-D, Mellmann A, Hacker J, Svanborg C, Dobrindt  
529 U. 2012. Comparison of asymptomatic bacteriuria *Escherichia coli* isolates from healthy  
530 individuals versus those from hospital patients shows that long-term bladder colonization  
531 selects for attenuated virulence phenotypes. *Infect Immun* 80:668–678.
- 532 43. Stojiljkovic I, Bäumlner AJ, Hantke K. 1994. Fur regulon in Gram-negative bacteria:  
533 Identification and characterization of new iron-regulated *Escherichia coli* genes by a Fur  
534 titration assay. *J Mol Biol* 236:531–545.
- 535 44. Murinda SE, Roberts RF, Wilson RA. 1996. Evaluation of colicins for inhibitory activity  
536 against diarrheagenic *Escherichia coli* strains, including serotype O157:H7. *Appl Environ*

- 537 Microbiol 62:3196–3202.
- 538 45. Curtis NAC, Eisenstadt RL, East SJ, Cornford RJ, Walker LA, White AJ. 1988. Iron-  
539 regulated outer membrane proteins of *Escherichia coli* K-12 and mechanism of action of  
540 catechol-substituted cephalosporins. Antimicrob Agents Chemother 32:1879–1886.
- 541 46. Perna NT, Plunkett G, Burland V, Mau B, Glasner JD, Rose DJ, Mayhew GF, Evans PS,  
542 Gregor J, Kirkpatrick HA, Pósfai G, Hackett J, Klink S, Boutin A, Shao Y, Miller L,  
543 Grotbeck EJ, Davis NW, Lim A, Dimalanta ET, Potamouisis KD, Apodaca J,  
544 Anantharaman TS, Lin J, Yen G, Schwartz DC, Welch RA, Blattner FR. 2001. Genome  
545 sequence of enterohaemorrhagic *Escherichia coli* O157:H7. Nature 409:529–533.
- 546 47. Eaton KA, Friedman DI, Francis GJ, Tyler JS, Young VB, Haeger J, Abu-Ali G, Whittam  
547 TS. 2008. Pathogenesis of renal disease due to enterohemorrhagic *Escherichia coli* in  
548 germ-free mice. Infect Immun 76:3054–3063.
- 549 48. Eaton KA, Fontaine C, Friedman DI, Conti N, Alteri CJ. 2017. Pathogenesis of colitis in  
550 germ-free mice infected with EHEC O157:H7. Vet Pathol 54:710–719.
- 551 49. Cardelli J, Konisky S. 1974. Isolation and characterization of an *Escherichia coli* mutant  
552 tolerant to colicins Ia and Ib. J Bacteriol 119:379–385.
- 553 50. Vassiliadis G, Destoumieux-Garzón D, Peduzzi J. 2011. Class II Microcins, p. 309–332.  
554 In Drider, D, Rebuffat, S (eds.), Prokaryotic Antimicrobial Peptides: From Genes to  
555 Applications. Springer New York, New York, NY.
- 556 51. Mistry J, Chuguransky S, Williams L, Qureshi M, Salazar GA, Sonnhammer ELL, Tosatto  
557 SCE, Paladin L, Raj S, Richardson LJ, Finn RD, Bateman A. 2021. Pfam: The protein  
558 families database in 2021. Nucleic Acids Res 49.
- 559 52. Eberhardt RY, Chang Y, Bateman A, Murzin AG, Axelrod HL, Hwang WC, Aravind L.

- 560 2013. Filling out the structural map of the NTF2-like superfamily. *BMC Bioinformatics*  
561 14.
- 562 53. Zhang D, de Souza RF, Anantharaman V, Iyer LM, Aravind L. 2012. Polymorphic toxin  
563 systems: Comprehensive characterization of trafficking modes, processing, mechanisms of  
564 action, immunity and ecology using comparative genomics. *Biol Direct* 7.
- 565 54. Huang T, Chang CY, Lohman JR, Rudolf JD, Kim Y, Chang C, Yang D, Ma M, Yan X,  
566 Crnovcic I, Bigelow L, Clancy S, Bingman CA, Yennamalli RM, Babnigg G, Joachimiak  
567 A, Phillips GN, Shen B. 2016. Crystal structure of SgcJ, an NTF2-like superfamily protein  
568 involved in biosynthesis of the nine-membered enediyne antitumor antibiotic C-1027. *J*  
569 *Antibiot (Tokyo)* 69.
- 570 55. Vuksanovic N, Zhu X, Serrano DA, Siitonen V, Metsa-Ketel M, Melan CE, Silvaggi NR.  
571 2020. Structural characterization of three noncanonical NTF2-like superfamily proteins:  
572 Implications for polyketide biosynthesis. *Acta Crystallogr Sect F Struct Biol Commun* 76.
- 573 56. Dunwell JM. 1998. Cupins: a new superfamily of functionally diverse proteins that  
574 include germins and plant storage proteins. *Biotechnol Genet Eng Rev* 15:1–32.
- 575 57. Dunwell JM, Purvis A, Khuri S. 2004. Cupins: the most functionally diverse protein  
576 superfamily? *Phytochemistry* 65:7–17.
- 577 58. Troxell B, Hassan HM. 2013. Transcriptional regulation by ferric uptake regulator (Fur) in  
578 pathogenic bacteria. *Front Cell Infect Microbiol* 3.
- 579 59. Lundrigan MD, Kadner RJ. 1986. Nucleotide sequence of the gene for the  
580 ferrienterochelin receptor FepA in *Escherichia coli*. Homology among outer membrane  
581 receptors that interact with TonB. *J Biol Chem* 261:10797–10801.
- 582 60. Escolar L, Pérez-Martín J, De Lorenzo V. 1998. Binding of the Fur (ferric uptake

- 583 regulator) repressor of *Escherichia coli* to arrays of the GATAAT sequence. J Mol Biol.
- 584 61. Martin P, Tronnet S, Garcie C, Oswald E. 2017. Interplay between siderophores and  
585 colibactin genotoxin in *Escherichia coli*. IUBMB Life 69:435–441.
- 586 62. Ganz T. 2009. Iron in innate immunity: starve the invaders. Curr Opin Immunol.
- 587 63. Zhu C, Ngeleka M, Potter AA, Allan BJ. 2002. Effect of *fur* mutation on acid-tolerance  
588 response and in vivo virulence of avian septicemic *Escherichia coli*. Can J Microbiol  
589 48:458–462.
- 590 64. Huja S, Oren Y, Biran D, Meyer S, Dobrindt U, Bernhard J, Becher D, Hecker M, Sorek  
591 R, Ron EZ. 2014. Fur is the master regulator of the extraintestinal pathogenic *Escherichia*  
592 *coli* response to serum. MBio 5.
- 593 65. Porcheron G, Dozois CM. 2015. Interplay between iron homeostasis and virulence: Fur  
594 and RyhB as major regulators of bacterial pathogenicity. Vet Microbiol.
- 595 66. Micenková L, Bosák J, Štaudová B, Kohoutová D, Čejková D, Woznicová V, Vrba M,  
596 Ševčíková A, Bureš J, Šmajš D. 2016. Microcin determinants are associated with B2  
597 phylogroup of human fecal *Escherichia coli* isolates. Microbiologyopen 5:490–498.
- 598 67. Leatham MP, Banerjee S, Autieri SM, Mercado-Lubo R, Conway T, Cohen PS. 2009.  
599 Precolonized human commensal *Escherichia coli* strains serve as a barrier to *E. coli*  
600 O157:H7 growth in the streptomycin-treated mouse intestine. Infect Immun 77:2876–  
601 2886.
- 602 68. Maltby R, Leatham-Jensen MP, Gibson T, Cohen PS, Conway T. 2013. Nutritional basis  
603 for colonization resistance by human commensal *Escherichia coli* strains HS and Nissle  
604 1917 against *E. coli* O157:H7 in the mouse intestine. PLoS One 8:e53957.
- 605 69. Manges AR, Geum HM, Guo A, Edens TJ, Fibke CD, Pitout JDD. 2019. Global

- 606 extraintestinal pathogenic *Escherichia coli* (ExPEC) lineages. Clin Microbiol Rev 32.
- 607 70. Bogema DR, McKinnon J, Liu M, Hitchick N, Miller N, Venturini C, Iredell J, Darling  
608 AE, Roy Chowdury P, Djordjevic SP. 2020. Whole-genome analysis of extraintestinal  
609 *Escherichia coli* sequence type 73 from a single hospital over a 2 year period identified  
610 different circulating clonal groups. Microb Genomics 6.
- 611 71. Datsenko KA, Wanner BL. 2000. One-step inactivation of chromosomal genes in  
612 *Escherichia coli* K-12 using PCR products. Proc Natl Acad Sci 97:6640–6645.
- 613 72. Gibson DG, Young L, Chuang R-Y, Venter JC, Hutchison CA, Smith HO. 2009.  
614 Enzymatic assembly of DNA molecules up to several hundred kilobases. Nat Methods  
615 6:343–345.
- 616 73. Simons RW, Houman F, Kleckner N. 1987. Improved single and multicopy *lac*-based  
617 cloning vectors for protein and operon fusions. Gene 53:85–96.
- 618 74. Miller JH. 1972. Experiments in molecular genetics, pp. 352-355. Cold Spring Harb Lab  
619 Press Cold Spring Harb Lab NY.
- 620 75. Abu-Ali GS, Ouellette LM, Henderson ST, Whittam TS, Manning SD. 2010. Differences  
621 in adherence and virulence gene expression between two outbreak strains of  
622 enterohaemorrhagic *Escherichia coli* O157:H7. Microbiology 156.
- 623 76. Pugsley AP, Oudega B. 1987. Methods of studying colicins and their plasmids, p. 105–  
624 161. In Hardy, KG (ed.), Plasmids, a Practical Approach. IRL Press.
- 625 77. Bankevich A, Nurk S, Antipov D, Gurevich AA, Dvorkin M, Kulikov AS, Lesin VM,  
626 Nikolenko SI, Pham S, Prjibelski AD, Pyshkin AV, Sirotkin AV, Vyahhi N, Tesler G,  
627 Alekseyev MA, Pevzner PA. 2012. SPAdes: a new genome assembly algorithm and its  
628 applications to single-cell sequencing. J Comput Biol 19:455–477.

- 629 78. Seemann T. 2015. Snippy: Rapid haploid variant calling and core SNP phylogeny.  
630 GitHub.
- 631 79. Nguyen NTT, Contreras-Moreira B, Castro-Mondragon JA, Santana-Garcia W, Ossio R,  
632 Robles-Espinoza CD, Bahin M, Collombet S, Vincens P, Thieffry D, van Helden J,  
633 Medina-Rivera A, Thomas-Chollier M. 2018. RSAT 2018: regulatory sequence analysis  
634 tools 20th anniversary. *Nucleic Acids Res* 46:W209–W214.
- 635 80. Solovyev V, Salamov A. 2011. Automatic annotation of microbial genomes and  
636 metagenomic sequences, p. 62–78. *In* *Metagenomics and its Applications in Agriculture,*  
637 *Biomedicine and Environmental Studies.*
- 638 81. Hartzell A, Chen C, Lewis C, Liu K, Reynolds S, Dudley EG. 2011. *Escherichia coli*  
639 O157:H7 of genotype lineage-specific polymorphism assay 211111 and clade 8 are  
640 common clinical isolates within Pennsylvania. *Foodborne Pathog Dis* 8:763–768.
- 641 82. Tatusova T, DiCuccio M, Badretdin A, Chetvernin V, Nawrocki EP, Zaslavsky L,  
642 Lomsadze A, Pruitt KD, Borodovsky M, Ostell J. 2016. NCBI prokaryotic genome  
643 annotation pipeline. *Nucleic Acids Res* 44:6614–6624.
- 644 83. Turatsinze J-V, Thomas-Chollier M, Defrance M, van Helden J. 2008. Using RSAT to  
645 scan genome sequences for transcription factor binding sites and cis-regulatory modules.  
646 *Nat Protoc* 3:1578–1588.
- 647 84. Livak KJ, Schmittgen TD. 2001. Analysis of relative gene expression data using real-time  
648 quantitative PCR and the 2- $\Delta\Delta$ CT method. *Methods* 25:402–408.
- 649 85. Appleyard RK. 1954. Segregation of new lysogenic types during growth of a doubly  
650 lysogenic strain derived from *Escherichia coli* K12. *Genetics* 39:440–52.
- 651 86. Blattner FR, Plunkett G, Bloch CA, Perna NT, Burland V, Riley M, Collado-Vides J,

- 652 Glasner JD, Rode CK, Mayhew GF, Gregor J, Davis NW, Kirkpatrick HA, Goeden MA,  
653 Rose DJ, Mau B, Shao Y. 1997. The complete genome sequence of *Escherichia coli* K-12.  
654 Science (80- ) 277:1453–62.
- 655 87. Riley LW, Remis RS, Helgerson SD, McGee HB, Wells JG, Davis BR, Hebert RJ, Olcott  
656 ES, Johnson LM, Hargrett NT, Blake PA, Cohen ML. 1983. Hemorrhagic colitis  
657 associated with a rare *Escherichia coli* serotype. N Engl J Med 308:681–685.
- 658 88. Cherepanov PP, Wackernagel W. 1995. Gene disruption in *Escherichia coli*: TcR and  
659 KmR cassettes with the option of Flp-catalyzed excision of the antibiotic-resistance  
660 determinant. Gene 158:9–14.
- 661 89. Guzman LM, Belin D, Carson MJ, Beckwith J. 1995. Tight regulation, modulation, and  
662 high-level expression by vectors containing the arabinose PBAD promoter. J Bacteriol  
663 177:4121–4130.
- 664 90. Larsen RA, Thomas MG, Postle K. 1999. Protonmotive force, ExbB and ligand-bound  
665 FepA drive conformational changes in TonB. Mol Microbiol 31:1809–1824.
- 666 91. Bolivar F, Rodriguez RL, Greene PJ, Betlach MC, Heyneker HL, Boyer HW, Crosa JH,  
667 Falkow S. 1977. Construction and characterization of new cloning vehicle. II. A  
668 multipurpose cloning system. Gene 2:95–113.

669

670 **Figures**

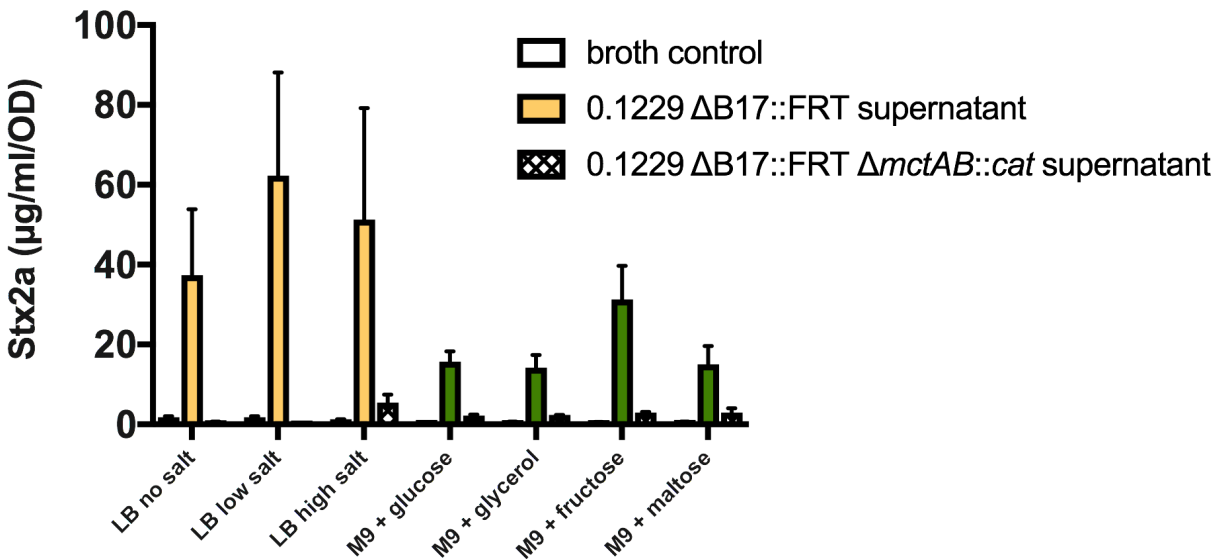

671

672 **Figure 1. Stx2a levels are amplified by culture supernatants from rich media.** Cell-free  
673 supernatants of *E. coli* 0.1229  $\Delta$ B17::FRT grown in various media were used to culture the *E. coli*  
674 O157:H7 strain PA2. Stx2a levels were measured by R-ELISA and normalized to the OD<sub>620</sub> of  
675 each culture; the mean + SEM are reported (minimum n = 3). M9 medium was supplemented with  
676 0.1% casamino acids, 0.005% thiamine, and 0.4% of the given carbon source. Cultures grown in  
677 spent supernatants of 0.1229  $\Delta$ B17::FRT are indicated by filled bars (yellow for LB, green for  
678 M9). Cultures grown in spent supernatants of the double microcin mutant, 0.1229  $\Delta$ B17::FRT  
679  $\Delta$ mctAB::cat, are given as crosshatched bars. For comparison, PA2 was grown in fresh media of  
680 the same composition, as indicated by empty bars. All such “broth control” cultures yielded less  
681 than 5  $\mu$ g/ml/OD Stx2a.



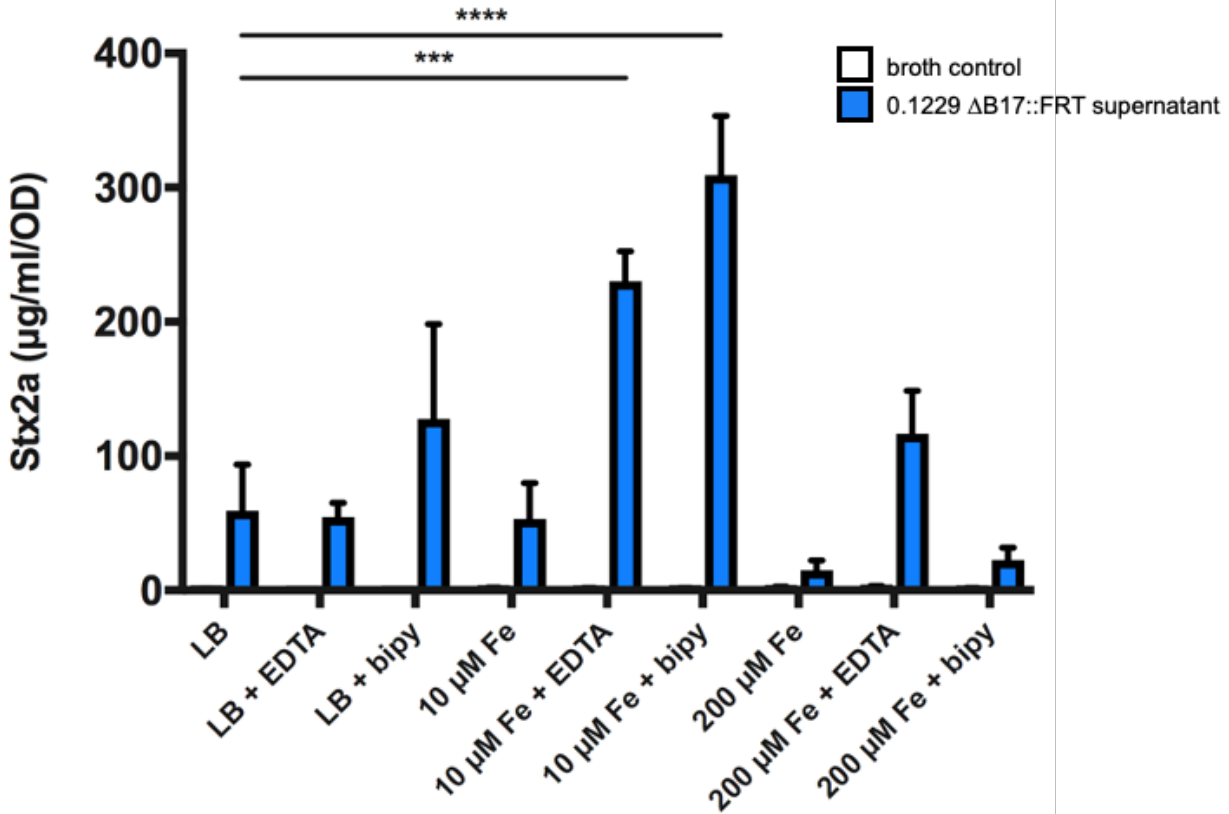

682

683 **Figure 2. Stx2a levels are diminished when grown in supernatants from high-iron media.**

684 Cell-free supernatants of *E. coli* 0.1229 ΔB17::FRT grown in various media were used to culture  
685 the *E. coli* O157:H7 strain PA2. For comparison, PA2 was grown in fresh media of the same  
686 composition, as indicated by “broth control.” Stx2a levels were measured by R-ELISA and  
687 normalized to the optical density of each culture; the mean + SEM are reported (n = 3 in all except  
688 10 µM Fe cultures, for which n = 2). The metal chelators EDTA and 2,2'-bipyridyl (bipy) were  
689 added to media at 0.2 mM. Statistical significance was determined by two-way ANOVA and  
690 Sidak's multiple comparisons test, assigning LB as the standard for the broth control and 0.1229  
691 ΔB17::FRT supernatant groups (\*\*\*, p < 0.001; \*\*\*\*, p < 0.0001).

692

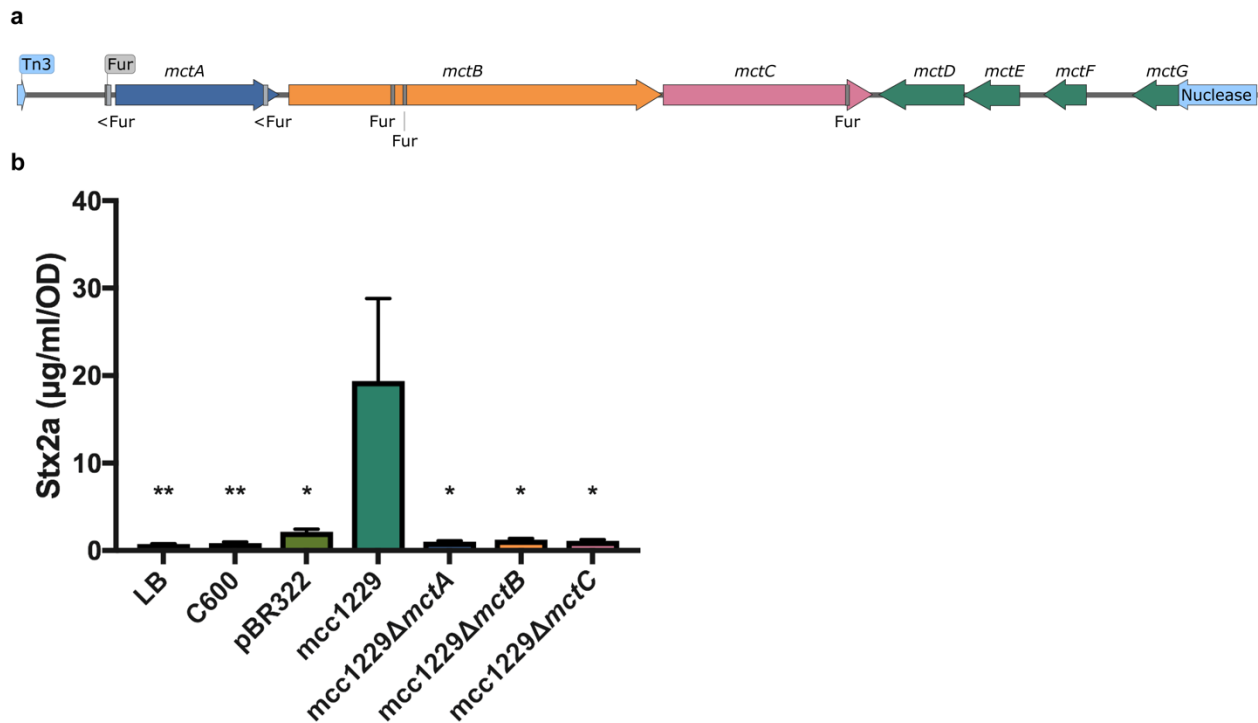

693 **Figure 3. A 5.2 kb region of p0.1229\_3 sufficient for Stx2a amplification encodes seven**  
694 **putative open reading frames and six predicted Fur binding sites.** (a) Annotation of p0.1229\_3  
695 was performed by NCBI's Prokaryotic Genomes Automatic Annotation Pipeline (PGAAP) as  
696 reported previously (15, 82). Fur sites were identified by the matrix-scan algorithm at the RSAT  
697 Prokaryotes webserver (79, 83). Those on the reverse strand are indicated by <. The map diagram  
698 was generated by SnapGene software (from GSL Biotech; available at [snapgene.com](http://snapgene.com)). (b) The  
699 *mcc1229* region of p0.1229\_3 was cloned into pBR322 and was sufficient to amplify Stx2a.  
700 Supernatants from the C600 strain alone or from the empty vector pBR322 did not amplify Stx2a.  
701 Stx2a expression of PA2 exposed to filtered culture supernatants was determined by ELISA as  
702 previously described. Values that differed significantly from the *mcc1229* supernatant are marked  
703 with asterisks (\*,  $p < 0.05$ ; \*\*,  $p < 0.01$ ). Statistical analysis was performed by one-way ANOVA  
704 with Dunnett's multiple comparisons test.

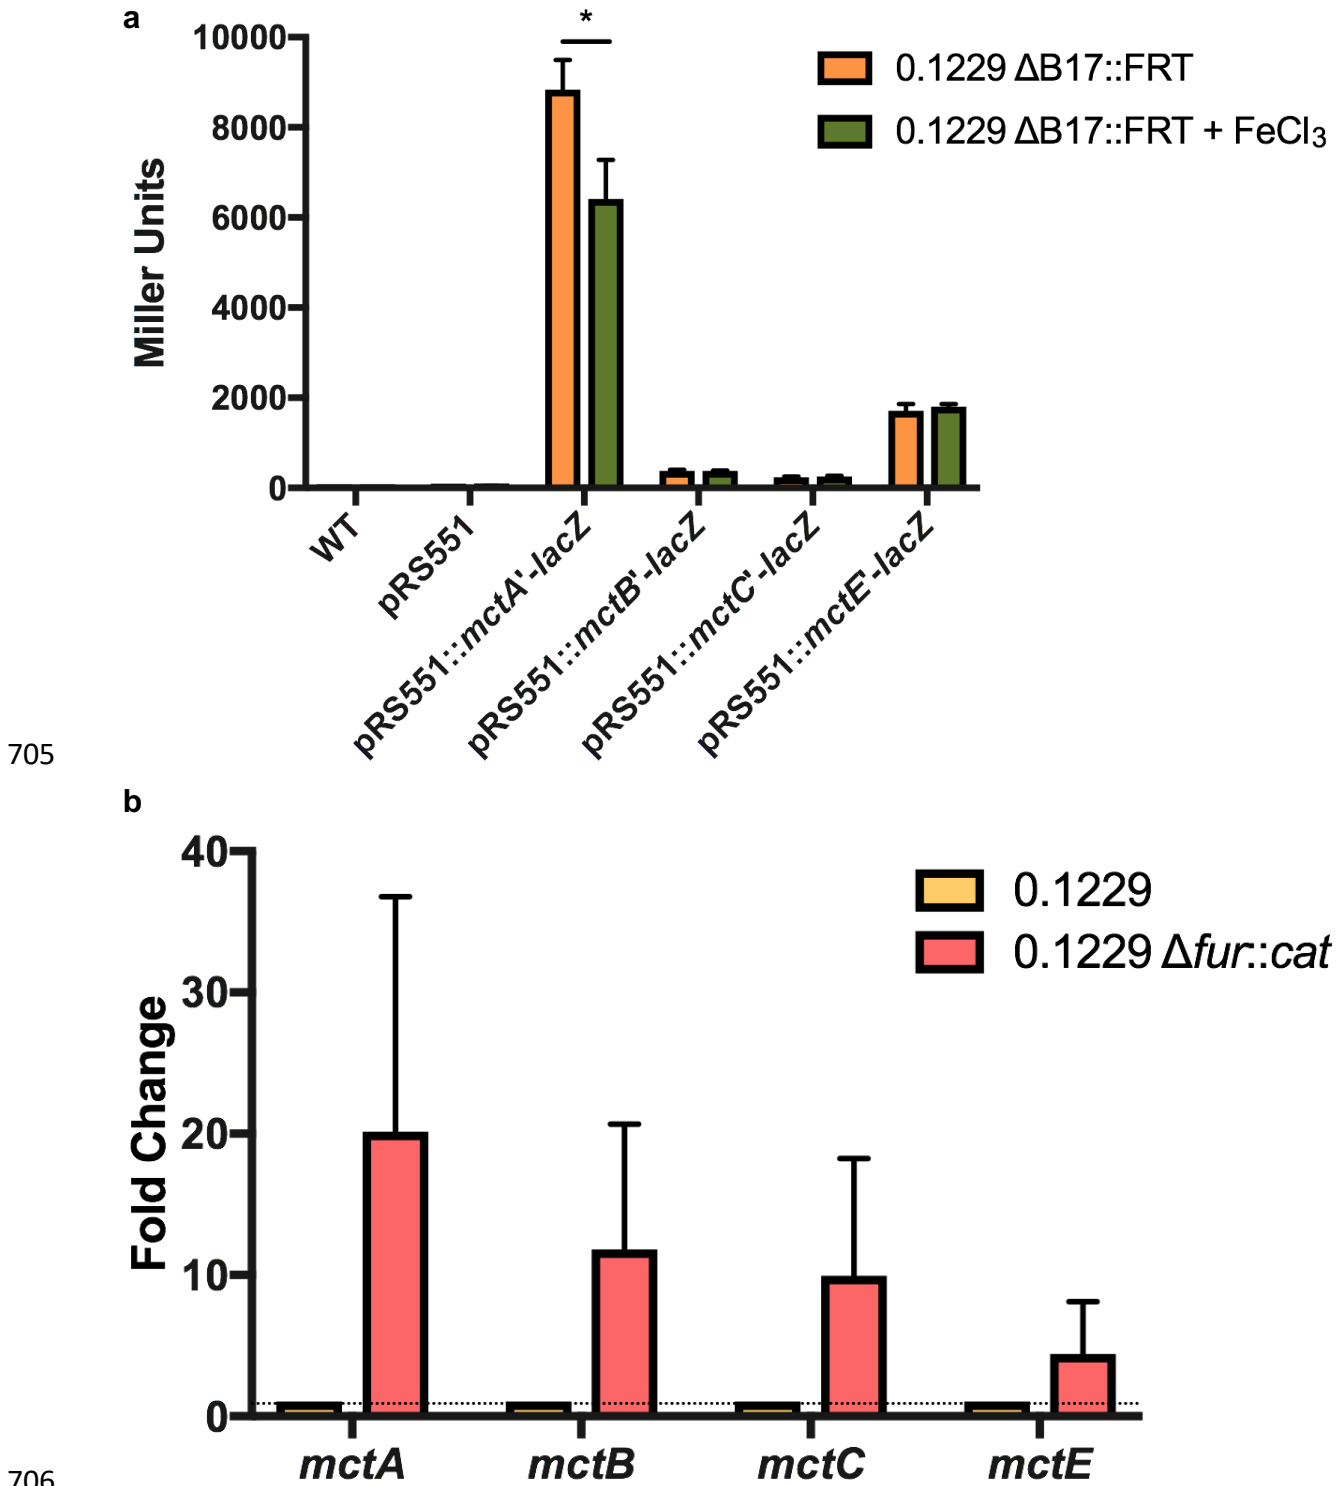

707 **Figure 4. Mcc1229 transcription is iron-regulated.** (a) A region upstream of the *mctA* ORF  
708 containing a putative Fur binding site was ligated into pRS551 and successfully promoted  
709 transcription of *lacZ*. Promoter regions upstream of the *mctB*, *mctC*, and *mctE* ORFs were also

710 tested in this manner. Transcriptional activity of the *mctA* promoter decreased when the medium  
711 was supplemented with 200  $\mu$ M FeCl<sub>3</sub>. Significance was determined by two-way ANOVA with  
712 Sidak's multiple comparisons test. (b) RNA was extracted from 16 h LB cultures of 0.1229 and  
713 0.1229  $\Delta fur::cat$ , converted to cDNA, and probed by qPCR for the *mctA*, *mctB*, *mctC*, and *mctE*  
714 ORFs. Gene expression relative to wildtype was determined by the  $\Delta\Delta C_T$  method using the  
715 ribosomal gene *rrsH* as an internal control (84). All Mcc1229 genes were consistently upregulated  
716 in the  $\Delta fur::cat$  strain but the difference was not statistically significant by two-way ANOVA.

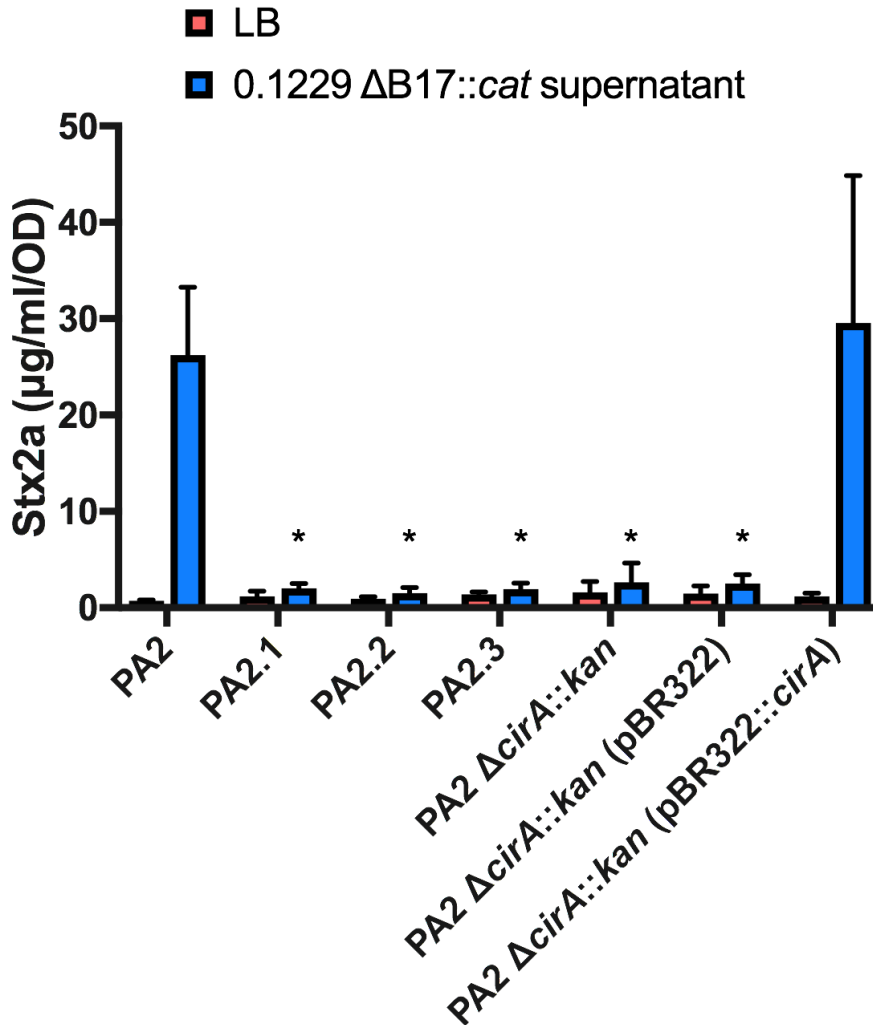

717

718 **Figure 5. CirA is the outer membrane receptor for Mcc1229.** Spontaneous mutants of PA2  
719 were resistant to inhibition by *E. coli* 0.1229  $\Delta B17::cat$ . Colonies were isolated from within the  
720 zones of clearing and subject to whole genome sequencing to identify the source of Mcc1229  
721 resistance. Multiple independent mutants (PA2.1, PA2.2, PA2.3) had mutations in CirA. A  
722  $\Delta cirA::kan$  mutant of PA2 is resistant to Mcc1229, and when *cirA* mutants are grown in spent  
723 supernatants of *E. coli* 0.1229  $\Delta B17::cat$ , they are insensitive to Stx amplification. Sensitivity is  
724 restored by complementation with pBR322::*cirA*. Asterisks mark significant difference between a  
725 given supernatant sample and the PA2 wildtype (two-way ANOVA, Dunnett's multiple  
726 comparisons test).

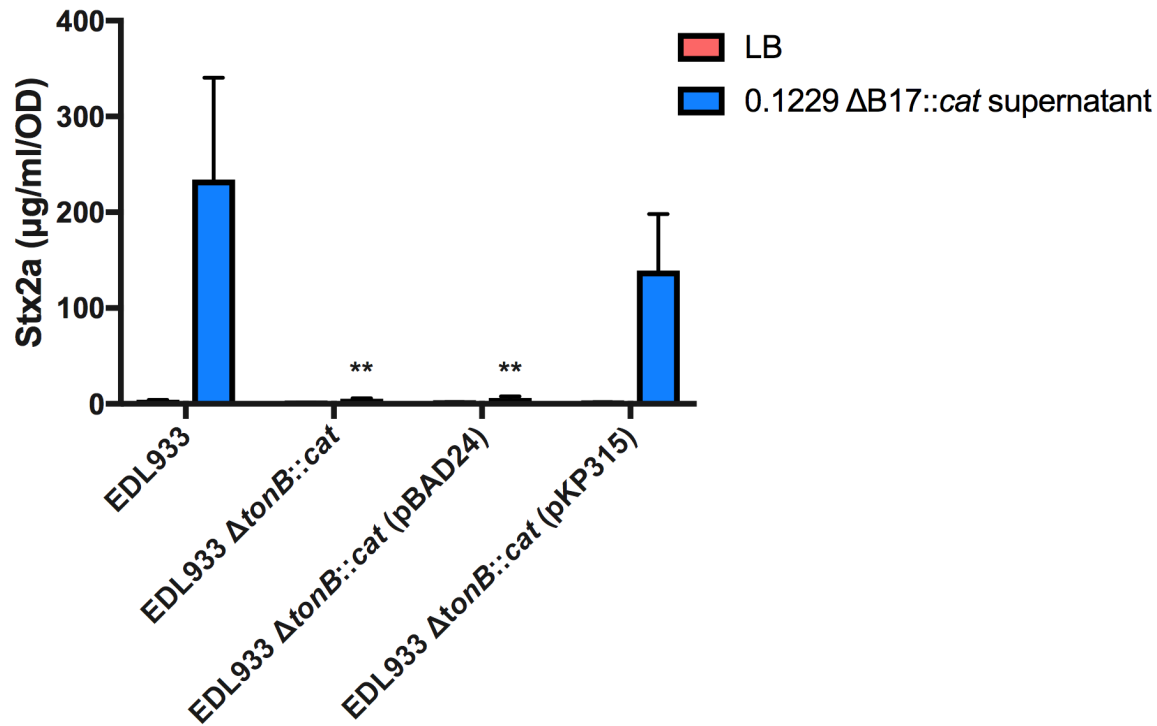

727

728 **Figure 6. TonB is required for Mcc1229 activity.** The periplasmic energy transducing protein  
729 TonB was deleted from *E. coli* O157:H7 strain EDL933 by one-step recombination. The resulting  
730 mutant does not increase Stx expression in response to spent supernatants containing Mcc1229.  
731 Activity is restored upon complementation with a plasmid copy of *tonB*, carried on pKP315.  
732 Because *tonB* is under P<sub>araC</sub> control on pKP315, all strains in this experiment were grown in the  
733 presence of arabinose. Asterisks mark significant difference between a given supernatant sample  
734 and the EDL933 wildtype (two-way ANOVA, Dunnett's multiple comparisons test).

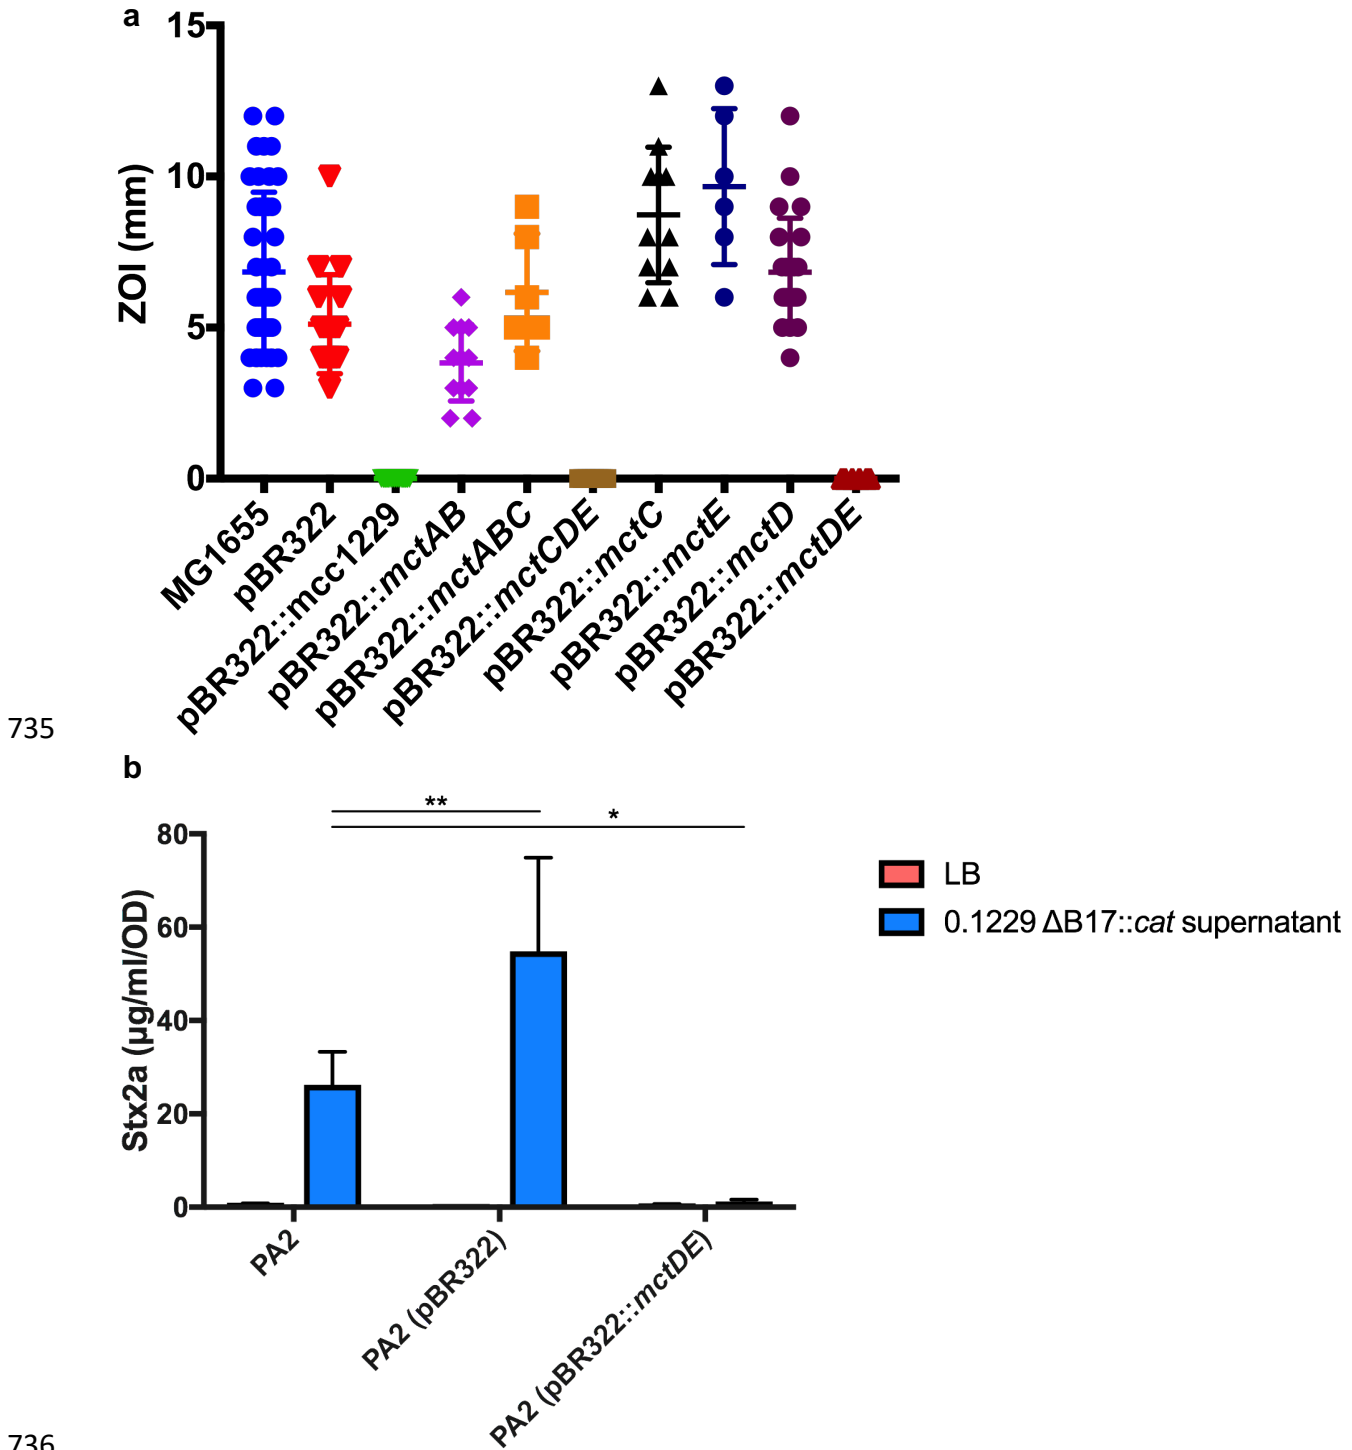

740 sensitive to Mcc1229 produced by *E. coli* 0.1229  $\Delta BI7::cat$ . MG1655 carrying pBR322::*mctDE*  
741 is fully resistant to the microcin. (b) Transformants of PA2 carrying pBR322::*mctDE* do not  
742 increase Stx expression when grown in spent supernatants of *E. coli* 0.1229  $\Delta BI7::cat$ . Asterisks  
743 mark significant difference between a given supernatant sample and the PA2 wildtype (two-way  
744 ANOVA, Dunnett's multiple comparisons test; \*,  $p < 0.05$ ; \*\*,  $p < 0.01$ ).



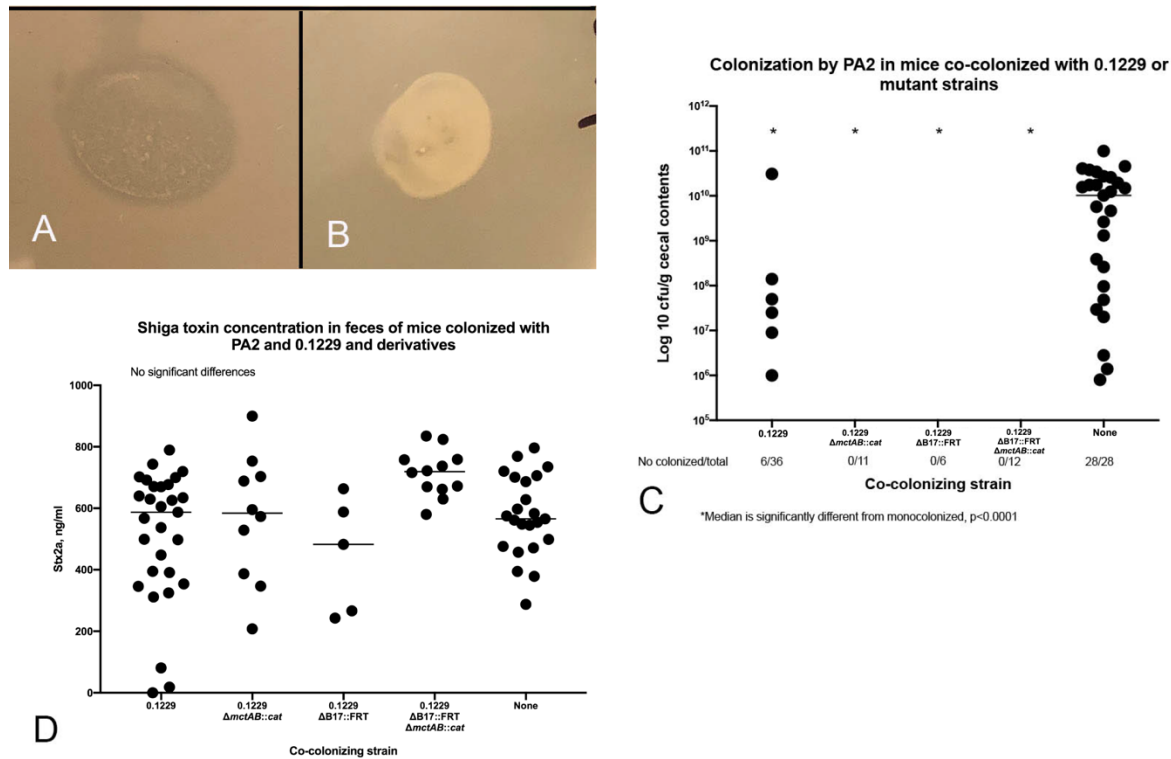

745

746 **Figure 8.** (a) and (b) Soft agar containing a suspension of PA2 was overlaid on LB, allowed to  
747 solidify, and fecal supernatants from infected mice were spotted on the overlay. Plates were  
748 incubated overnight at 37°C. (a) Fecal supernatants from mice co-colonized with 0.1229 and PA2  
749 prevented growth of PA2, resulting in a zone of clearing in the soft agar. (b) Supernatants from  
750 mice colonized with 0.1229  $\Delta B17::FRT \Delta mctAB::cat$  did not affect PA2 growth. (c) PA2  
751 colonization in co-colonized mice. PA2 colonization was detectable in only 16% of mice co-  
752 colonized by wild-type 0.1229 and in none of the mice colonized by 0.1229  $\Delta mctAB::cat$ , 0.1229  
753  $\Delta B17::FRT$ , or 0.1229  $\Delta B17::FRT \Delta mctAB::cat$ . In contrast 100% of mice inoculated with PA2  
754 alone became colonized (also see Table 2). (d) Low colonization level did not affect Stx  
755 production. Stx was detected in all mouse groups and concentration ranged from 18 to 900 ng/ml.  
756 There were no differences between groups.

757 **Tables**

| <b>Table 1. Strains, primers, and plasmids.</b>     |                                                                                                                     |                  |
|-----------------------------------------------------|---------------------------------------------------------------------------------------------------------------------|------------------|
| <i>Strain</i>                                       | <i>Characteristics</i>                                                                                              | <i>Reference</i> |
| C600                                                | K-12 derivative                                                                                                     | (85)             |
| MG1655                                              | K-12 derivative                                                                                                     | (86)             |
| 0.1229                                              | O18:H1, B2 phylogroup, AmpR, TetR                                                                                   | (15)             |
| 0.1229 $\Delta$ B17:: <i>cat</i>                    | p0.1229 $\Delta$ <i>mcbABCDEFGHIJ::cat</i> , AmpR, TetR, CamR                                                       | (15)             |
| 0.1229 $\Delta$ B17::FRT                            | p0.1229 $\Delta$ <i>mcbABCDEFGHIJ::FRT</i> , AmpR, TetR                                                             | This study       |
| 0.1229 $\Delta$ <i>mctAB::cat</i>                   | p0.1229 $\Delta$ <sup>2850-5473</sup> :: <i>cat</i> , AmpR, TetR, CamR                                              | (15)             |
| 0.1229 $\Delta$ B17::FRT $\Delta$ <i>mctAB::cat</i> | p0.1229 $\Delta$ <i>mcbABCDEFGHIJ::FRT</i> , p0.1229 $\Delta$ <sup>2850-5473</sup> :: <i>cat</i> , AmpR, TetR, CamR | This study       |
| 0.1229 $\Delta$ <i>fur::cat</i>                     | AmpR, TetR, CamR                                                                                                    | This study       |
| PA2                                                 | O157:H7, <i>stx</i> <sub>2a</sub>                                                                                   | (81)             |
| PA2 $\Delta$ <i>cirA::kan</i>                       | KanR                                                                                                                | This study       |
| PA2.1                                               | <i>CirA.Gln24ArgfsTer35</i>                                                                                         | This study       |
| PA2.2                                               | <i>cirA.-329 -244del</i>                                                                                            | This study       |
| PA2.3                                               | <i>CirA.Leu35GlyfsTer51</i>                                                                                         | This study       |
| EDL933                                              | O157:H7, <i>stx</i> <sub>1a</sub> <i>stx</i> <sub>2a</sub>                                                          | (87)             |
| EDL933 $\Delta$ <i>tonB::cat</i>                    | CamR                                                                                                                | This study       |
| <i>Plasmid</i>                                      | <i>Characteristics</i>                                                                                              | <i>Reference</i> |
| pKD3                                                | CamR                                                                                                                | (71)             |
| pKD4                                                | KanR                                                                                                                | (71)             |
| pKD46                                               | P <sub>araC</sub> - $\lambda$ recombinase, AmpR                                                                     | (71)             |
| pCP11B                                              | FLP recombinase, KanR                                                                                               | (88)             |
| pKD46-Kan                                           | KanR                                                                                                                | (15)             |
| pBAD24                                              | P <sub>araC</sub> , AmpR                                                                                            | (89)             |
| pKP315                                              | pBAD24::P <sub>araC</sub> - <i>tonB</i> , AmpR                                                                      | (90)             |
| pBR322                                              | AmpR, TetR                                                                                                          | (91)             |
| pBR322:: <i>cirA</i>                                | AmpR, TetR                                                                                                          | This study       |
| pBR322::mcc1229                                     | pBR322::p0.1229 $\Delta$ <sup>32745-7950</sup> , TetR                                                               | (15)             |
| pBR322::mcc1229 $\Delta$ <i>mctA</i>                | pBR322::p0.1229 $\Delta$ <sup>32745-7950</sup> $\Delta$ (3084-3792), TetR                                           | This study       |
| pBR322::mcc1229 $\Delta$ <i>mctB</i>                | pBR322::p0.1229 $\Delta$ <sup>32745-7950</sup> $\Delta$ (3831-5423), TetR                                           | This study       |
| pBR322::mcc1229 $\Delta$ <i>mctC</i>                | pBR322::p0.1229 $\Delta$ <sup>32745-7950</sup> $\Delta$ (5426-6319), TetR                                           | This study       |
| pBR322:: <i>mctAB</i>                               | pBR322::p0.1229 $\Delta$ <sup>32745-5425</sup> , TetR                                                               | This study       |
| pBR322:: <i>mctABC</i>                              | pBR322::p0.1229 $\Delta$ <sup>32745-6343</sup> , TetR                                                               | This study       |
| pBR322:: <i>mctC</i>                                | pBR322::p0.1229 $\Delta$ <sup>35426-6343</sup> , TetR                                                               | This study       |
| pBR322:: <i>mctCDE</i>                              | pBR322::p0.1229 $\Delta$ <sup>35426-7047</sup> , TetR                                                               | This study       |
| pBR322:: <i>mctE</i>                                | pBR322::p0.1229 $\Delta$ <sup>37047-6703</sup> , TetR                                                               | This study       |
| pBR322:: <i>mctD</i>                                | pBR322::p0.1229 $\Delta$ <sup>36706-6320</sup> , TetR                                                               | This study       |
| pBR322:: <i>mctDE</i>                               | pBR322::p0.1229 $\Delta$ <sup>37047-6320</sup> , TetR                                                               | This study       |
| pRS551                                              | promoterless <i>lacZ</i> , AmpR, KanR                                                                               | (73)             |

|                            |                                                                               |                           |
|----------------------------|-------------------------------------------------------------------------------|---------------------------|
| pRS551:: <i>mctA'-lacZ</i> | AmpR, KanR                                                                    | This study                |
| pRS551:: <i>mctB'-lacZ</i> | AmpR, KanR                                                                    | This study                |
| pRS551:: <i>mctC'-lacZ</i> | AmpR, KanR                                                                    | This study                |
| pRS551:: <i>mctE'-lacZ</i> | AmpR, KanR                                                                    | This study                |
| <i>Primer</i>              | <i>Sequence</i>                                                               | <i>T<sub>a</sub> (°C)</i> |
| mcb_VF                     | GGGGCTTAAAGGGGTAGTGT                                                          | 49                        |
| mcb_VR                     | CCTAACAACGCCACGACTTT                                                          |                           |
| Δ <i>mctAB</i> KF          | acacatttcgtacagcctttacactcgggtgaattagcggccctagatgcaGTGT<br>AGGCTGGAGCTGCTTC   | 67                        |
| Δ <i>mctAB</i> KR          | ttaaacctcatgtttgtgatctataatctgtgcttaggtatattatCATATG<br>AATATCCTCCTTAG        |                           |
| Δ <i>mctAB</i> VF          | GAAGATATCGCACGCCTCTC                                                          | 54.5                      |
| Δ <i>mctAB</i> VR          | CGCCTGTTTGGCTATATGTG                                                          |                           |
| cirA KF                    | gcagtatttactgaagtgaagtcgccgggttcgccgggeatcttctcaGTG<br>TAGGCTGGAGCTGCTTC      | 72                        |
| cirA KR                    | ctatttctgtgcatggcctgtgttagcggtcgatgacgatggcgaacgCATA<br>TGAATATCCTCCTTAG      |                           |
| cirA_VF                    | CCCGACGCTTATCGATCAGGG                                                         | 56                        |
| cirA_VR                    | TGGTCCGGCTTTCTGGGATG                                                          |                           |
| cirA_fwd                   | ggcccttctgttctcaagaaGTTTCTCCCTTCCTTGCTAAG                                     | 57                        |
| cirA_rev                   | taagctgcaaacatgagaaTCAGAAGCGATAATCCAC                                         |                           |
| pBR322_cirF                | TTCTCATGTTTGACAGCTTATC                                                        | 45                        |
| pBR322_cirR                | TTCTTGAAGACGAAAGGG                                                            |                           |
| pBR322_cirVF               | GGGCGACACGGAATGTTG                                                            | 53                        |
| pBR322_cirVR               | GCGCTAGCAGCACGCC                                                              |                           |
| fur KF                     | aaagccaacctgcaggttgctttctcgttcaggctggcGTGTAGGCT<br>GGAGCTGCTTC                | 72                        |
| fur KR                     | tctaataagtgaaaccttagtaacaggacagattccgcCATATGAAT<br>ATCCTCCTTAG                |                           |
| fur_VF                     | GCCGCACGTTTGAGGAATTT                                                          | 52                        |
| fur_VR                     | TTTGCCAGGGACTTGTGGTT                                                          |                           |
| pBR322_insF                | GCAAAAACAGGAAGGCAAAATG                                                        | 46                        |
| pBR322_insR                | CTGTCAGACCAAGTTTACTC                                                          |                           |
| pBR322_mctAF               | gtatatatgagtaaacttggtctgacagGAACCTACAACACATGT<br>GTAAAACGTCAATG               | 60                        |
| pBR322_mctBR               | tgcttctctgttttgcTTTTAAACCTCATGTTTTGTG                                         | 57                        |
| pBR322_mctCR               | tgcttctctgttttgcGGGGAAGCCCCCTTAGATTAATG                                       | 60                        |
| pBR322_mctDER              | tgcttctctgttttgcATATGCTTGCTTGGGAAATTC                                         | 60                        |
| pBR322_mctCF               | taaacttggtctgacagATGAATAATCTTATAAAAAAAGGA<br>AATCATAGAAAAATTTAAGAAATATAATTTTC | 53                        |
| pBR322_mctEF               | taaacttggtctgacagATATGCTTGCTTGGGAAATTC                                        | 58                        |
| pBR322_mctER               | tgcttctctgttttgcTCACACTACCTTCCTCATATC                                         |                           |
| pBR322_mctDF               | taaacttggtctgacagGTGACTAATTTTAAATCAGACTTA<br>AATC                             | 54                        |
| pBR322_mctDR               | tgcttctctgttttgcCCATTAATCTAAGGGGGC                                            |                           |

|                 |                                           |    |
|-----------------|-------------------------------------------|----|
| pBR322 insVF    | TTTGCAAGCAGCAGATTACG                      | 49 |
| pBR322 insVR    | GCCTCGTGATACGCCTATTT                      |    |
| $\Delta$ mctA F | CATAAAGCCCGTAATATAC                       | 55 |
| $\Delta$ mctA R | AACACCCCAATTATATATTTG                     |    |
| $\Delta$ mctB F | AAATGAATAATCTTATAAAAAAGGAAATC             | 57 |
| $\Delta$ mctB R | TTTATAATCCTTAAAGCCCG                      |    |
| $\Delta$ mctC F | CCATTAATCTAAGGGGGC                        | 57 |
| $\Delta$ mctC R | TTTTAAACCTCATGTTTTGTG                     |    |
| pRS551_mctAF    | GAATTCCTATAACCATTAAAAACTTGATTACTAT<br>CTC | 47 |
| pRS551_mctAR    | CCCGGGATCCTTAGAAGAACATCATC                |    |
| pRS551_mctBF    | GAATTCCAAAGAATCCATATCCAG                  | 47 |
| pRS551_mctBR    | CCCGGGTAAGCAGGATCCTATTTCTCCTATTGAA<br>TC  |    |
| pRS551_mctCF    | TAAGCAGAATTCGCTACACAGATTTAAG              | 49 |
| pRS551_mctCR    | TAAGCAGGATCCATAGTGCAATATATC               |    |
| pRS551_mctEF    | TAAGCAGAATTCGCTGCATAGCTATGCATG            | 55 |
| pRS551_mctER    | TAAGCAGGATCCTATGACTGGGATTACTCT            |    |
| pRS551_VF       | TGCCAGGAATTGGGGATC                        | 51 |
| pRS551 VR       | GTTTTCCCAGTCACGACGTT                      |    |
| qPCR rrsH F     | CGATGCAACGCGAAGAACCT                      | 60 |
| qPCR rrsH R     | CCGGACCGCTGGCAACAAA                       |    |
| qPCR mctA 3270F | AGCCTCAACATGCCTAACGG                      | 60 |
| qPCR mctA 3420R | TGGATAATGGTGGAGGTAAGCAC                   |    |
| qPCR mctB 4389F | GCACTTAGCTCCAAATTCGC                      | 60 |
| qPCR mctB 4567R | GCGGAGCTGATACCAAACAG                      |    |
| qPCR mctC 5589F | TGGCAAATGACAACCTTTCCCG                    | 60 |
| qPCR mctC 5715R | GCGCCATCACGTAAGCATTT                      |    |
| qPCR mctE 6547F | GATATGCGTCCAGCGAGGAT                      | 60 |
| qPCR mctE 6450R | GCTTTCCTGAAACACAAGCA                      |    |

758

**Table 2. Colonization by PA2 in mice co-colonized by 0.1229 and derivatives.**

| <i>Co-colonizing strain</i>                                          | <i>No. in group</i> | <i>No. colonized</i> | <i>Percent</i> |
|----------------------------------------------------------------------|---------------------|----------------------|----------------|
| 0.1229                                                               | 36                  | 6                    | 17             |
| 0.1229 $\Delta$ mctAB:: <i>cat</i>                                   | 11                  | 0                    | 0              |
| 0.1229 $\Delta$ B17:: <i>FRT</i>                                     | 6                   | 0                    | 0              |
| 0.1229 $\Delta$ B17:: <i>FRT</i><br><i>\Delta</i> mctAB:: <i>cat</i> | 12                  | 0                    | 0              |
| None                                                                 | 28                  | 28                   | 100            |

759

**Table 3. Clinical illness due to PA2 in mice co-colonized by 0.1229 or its derivatives.**

| <i>Infection</i> | <i>No. moribund or dead/total by 7 days PI</i> | <i>Percent</i> |
|------------------|------------------------------------------------|----------------|
| PA2 alone        | 4/28                                           | 14%            |
| 0.1229 + PA2     | 14/36                                          | 39%            |

|                                                  |      |     |
|--------------------------------------------------|------|-----|
| 0.1229 $\Delta mctAB::cat$ + PA2                 | 2/11 | 18% |
| 0.1229 $\Delta B17::FRT$ + PA2                   | 2/6  | 33% |
| 0.1229 $\Delta B17::FRT \Delta mctAB::cat$ + PA2 | 0/12 | 0%  |

760

## 761 **Acknowledgments**

762 This work was supported by grant 1 R21 AI130856-01A1 to E.G.D. by the National Institute of  
763 Allergy and Infectious Diseases and by USDA National Institute of Food and Agriculture Federal  
764 Appropriations to E.G.D. under project PEN04464 and accession number 1015714.

765

## 766 **Author Statements**

767 The authors declare that there are no conflicts of interest.
